1    **High sampling effectiveness for non-bee pollinators using**  
2    **vane traps in both open and wooded habitats**

3

4    Running Title: Vane traps sample non-bee pollinators

5

6    **Mark A. Hall**<sup>1,2\*</sup>, **Eliette L. Reboud**<sup>1,3</sup>

7

8    <sup>1</sup> Hawkesbury Institute for the Environment, Western Sydney  
9    University, Richmond 2753, NSW, Australia.

10    <sup>2</sup> Department of Ecology, Environment and Evolution, La  
11    Trobe University, Bundoora 3086, VIC, Australia.

12    <sup>3</sup> Montpellier SupAgro, 2 Place Pierre Viala, 34060 Montpellier  
13    cedex 01, France.

14

15    \*Corresponding author: [mark.hall@westernsydney.edu.au](mailto:mark.hall@westernsydney.edu.au)

16    Ph: +61 (04) 90051212

17    ORCID: 0000-0003-4273-980X

18

# 19     **Abstract**

- 20            1. Non-bee insects are important for pollination, yet few  
21            studies have assessed the effectiveness of sampling  
22            these taxa using low cost passive techniques, such as  
23            coloured vane traps, among different habitat types.
- 24            2. This study sampled 192 sites—108 in wooded and 84 in  
25            open habitats within an agricultural region of southern  
26            Australia. Pairs of blue and yellow vane traps were  
27            placed at each site for a period of seven days during the  
28            austral spring.
- 29            3. Overall, 3114 flies (Diptera) from 19 families and  
30            528 wasps (non-bee and non-formicid Hymenoptera)  
31            from 16 families were collected during the study. This  
32            sampling was representative of the region, with vane  
33            traps equally or more likely to collect as many families  
34            from both taxa as those reported on the Atlas of Living  
35            Australia (ALA) database for the sampling area.
- 36            4. Blue vane taps (BVTs) had greater average richness of  
37            both flies and wasps and greater abundance of  
38            individuals than yellow vane traps (YVTs). BVTs were  
39            particularly favoured by certain fly and wasp families  
40            known to pollinate flowers (e.g. Syrphidae,  
41            Bombyliidae and Scoliidae), whilst YVTs sampled  
42            some less common fly families, such as Acroceridae

43 and Bibionidae that also provide additional ecosystem  
44 services to pollination.

45 5. Vane traps are an effective passive sampling technique  
46 for non-bee pollinators, such as flies and wasps. This  
47 study supports the use of vane traps as a component of  
48 the sampling protocol for ecological census and  
49 population monitoring within multiple habitat types, to  
50 effectively sample a more complete pollinator  
51 community.

52

### 53 **Key words**

54 Wasp trapping, Fly trapping, Unscented colour traps, Colour  
55 preference, Habitat type, BVT, YVT, Agricultural landscapes,  
56 Biological repository, Online database

# 57 INTRODUCTION

58 Understanding the distribution of bees within agricultural  
59 landscapes has received much of the research interest in  
60 pollination and community ecology (Kremen *et al.*, 2002;  
61 Kennedy *et al.*, 2013; Koh *et al.*, 2016). This is largely due to  
62 their important role in the pollination of many native plant and  
63 crop species (Heard, 1999; Morse & Calderone, 2000; Klein *et al.*, 2006). However, there is also growing evidence of the  
64 importance of non-bee insect taxa in pollination, such as flies,  
65 wasps, beetles and butterflies (Potts *et al.*, 2016; Rader *et al.*,  
66 2016; Ollerton, 2017). Some of these non-bee taxa also play a  
67 vital role in other ecosystem services, such as pest control and  
68 nutrient cycling (Zhang *et al.*, 2007; McCravy, 2018), and may  
69 forage more effectively than bees under different climatic  
70 conditions (Inouye & Pyke, 1988; Lefebvre *et al.*, 2018). Non-  
71 bee pollinators may even replace bees as the dominant flower  
72 visitors in heavily modified environments (Stavert *et al.*, 2018).  
73 Further, pollination may be more effectively achieved if  
74 multiple species, including non-bee pollinators, visit flowers  
75 (Brittain *et al.*, 2013; Alomar *et al.*, 2018; Winfree *et al.*, 2018;  
76 Thomson, 2019). Yet to date, non-bee pollinators have been  
77 under-represented in pollination studies and there is no  
78 consensus on a passive survey method that effectively samples  
79 both the bee and non-bee pollinator fauna of a given area.

81

82 Active sampling is often used for targeting particular species,  
83 recording plant-pollinator interactions or obtaining density  
84 estimates for a given area (Larsson & Franzen, 2008; Campbell  
85 *et al.*, 2016; Taki *et al.* 2018). However, sampling in this way  
86 can be time consuming, and results may be biased by the skills  
87 and experience of surveyors (Westphal *et al.*, 2008; McCravy,  
88 2018). Alternatively, passive sampling allows for a greater  
89 range of data collection (i.e. day and night, across seasons) at a  
90 relatively low cost (Saunders & Luck, 2013; McCravy, 2018).  
91 Passive sampling methods are usually easy to install and do not  
92 require any specialist skills from the operator (Missa *et al.*,  
93 2009; Westphal *et al.*, 2008; Saunders & Luck, 2013). Many  
94 different trapping methods are potentially suited to sampling  
95 insect fauna, depending on the type of question being asked. A  
96 simple and effective sampling technique is the use of coloured  
97 components, which are known to attract many pollinator groups  
98 (Kirk, 1984; Pickering & Stock, 2003; Desouhant *et al.*, 2010;  
99 Vrdoljak & Samways, 2012). For example, coloured pan traps  
100 are a widely used and often highly successful method for  
101 sampling the pollinator community (Westphal *et al.*, 2008;  
102 Saunders & Luck, 2013). Coloured sticky traps have also been  
103 used for arthropod studies, however these can vary greatly in  
104 their ability to collect certain groups (e.g. Hymenoptera,  
105 Coleoptera, Hoback *et al.*, 1999; Pickering & Stock, 2003) and  
106 make identification of small specimens difficult (i.e. <4 mm,

107 Pickering & Stock, 2003). Coloured Malaise traps are rarely  
 108 used for pollinator-specific surveys and are not as efficient as  
 109 pan traps (Campbell & Hanula, 2007). However, non-coloured  
 110 Malaise traps are widely used and effective for general  
 111 arthropod sampling (Kitching *et al.*, 2001; Campbell & Hanula,  
 112 2007; Missa *et al.*, 2009). Coloured vane traps are much less  
 113 studied, but have recently shown great potential, especially for  
 114 bees (Gibbs *et al.*, 2017; Hall, 2018). Yet very little is known  
 115 about their effectiveness in sampling the non-bee pollinator  
 116 community.

117

118 The quality of colours used for passive trapping varies  
 119 according to trap type. When sampling pollinators using pan,  
 120 sticky or vane traps, the most commonly used colours are  
 121 white, yellow and blue (Abrahamczyk *et al.*, 2010; Vrdoljak &  
 122 Samways, 2012; McCravy, 2018). Blue and yellow coloured  
 123 pan traps are often found to be the most attractive to insects,  
 124 but there is no consensus on the greater attraction of either  
 125 colour for different taxa or in varied habitat types (Kirk, 1984;  
 126 Campbell & Hanula, 2007; Abrahamczyk *et al.*, 2010;  
 127 Saunders & Luck, 2013). This is possibly due to variance in  
 128 reflectance and vibrancy owing to a lack of consistent quality  
 129 of colour and design (e.g. pre-painted bowls: Campbell &  
 130 Hanula, 2007; Joshi *et al.*, 2015, self-painted bowls: Westphal  
 131 *et al.*, 2008; Shrestha *et al.*, 2019). This makes comparing

132 different pan trap studies problematic. Some pollinating insect  
 133 taxa, such as butterflies and moths (Lepidoptera), also appear to  
 134 be largely underrepresented in pan trap studies (Missa *et al.*,  
 135 2009; Vrdoljak & Samways, 2012) but are sometimes caught in  
 136 large numbers using Malaise traps (Campbell & Hanula, 2007).  
 137 However, Malaise traps do not appear to be particularly  
 138 efficient at sampling non-*Apis* bees (Bartholomew & Prowell,  
 139 2005; Campbell & Hanula, 2007; Missa *et al.*, 2009), thus do  
 140 not provide comprehensive sampling for pollinators.  
 141 Alternatively, vane traps come in only two colours (yellow and  
 142 blue) and their commercial availability (and thus consistency of  
 143 colour) potentially allows for greater comparison between  
 144 studies (Hall, 2018).

145  
 146 Vane traps are very effective at attracting bees without the need  
 147 for pheromones or other liquids (Stephen & Rao, 2005; Hall,  
 148 2018), and are increasingly being used to sample wild bee  
 149 populations worldwide (Kimoto *et al.*, 2012; Lentini *et al.*,  
 150 2012; Gibbs *et al.*, 2017). Both Stephen & Rao (2005) and Hall  
 151 (2018) found blue vane traps (BVTs) to be particularly  
 152 effective at sampling wild bee diversity compared to yellow  
 153 vane traps (YVTs). Yet, in the Stephen & Rao (2005) study,  
 154 very few non-bee pollinators were sampled, and no reports of  
 155 non-bee taxa appear in other vane trap studies, other than to  
 156 mention that they were removed (e.g. Joshi *et al.*, 2015).

157 However, because bees are often poorly represented using other  
 158 passive methods typically used to survey arthropods (e.g. sticky  
 159 traps: Pickering & Stock, 2003, Malaise traps: Missa *et al.*,  
 160 2009), if we are to effectively sample both bee and non-bee  
 161 communities, a more representative passive survey method is  
 162 required. Vane traps are one such possibility as they are easy to  
 163 install, provide consistent sampling effectiveness over large  
 164 areas and are useable over longer time periods, compared with  
 165 other widely used methods (Stephen & Rao, 2007; Kimoto *et*  
 166 *al.*, 2012; Lentini *et al.*, 2012). However, to truly test the  
 167 effectiveness of this trapping technique, we also need to  
 168 compare results to what is known for a given area. This can be  
 169 achieved by utilising online biological repositories (Belbin &  
 170 Williams, 2016).

171

172 This study tests the efficacy of BVTs and YVTs in sampling  
 173 the non-bee fauna of both open and wooded areas within an  
 174 agricultural landscape of southern Australia. To test this, the  
 175 following questions were asked:

- 176 1) Do vane traps capture a representative sample of the  
 177 non-bee pollinating fauna of agricultural landscapes?
- 178 2) Is there a difference in the effectiveness of vane traps  
 179 when sampling flies and wasps using different colours  
 180 and/or within open and wooded environments?



181        3) Is there a consistent response between the two  
182                taxonomic groups and/or families within them?

183

## 184        **MATERIALS AND METHODS**

### 185        **Study area and system**

186        This study was conducted across a rural landscape of 11,550  
187        km<sup>2</sup> on the riverine plains of north-central Victoria, Australia,  
188        with a sampling area of ~3,600 km<sup>2</sup> (Fig. S1a). The region has  
189        been transformed by human land-use, predominantly  
190        agricultural production, experiencing extensive clearing of over  
191        80% of native vegetation (Environmental Conservation  
192        Council, 2001). Much of the wooded vegetation now occurs  
193        along linear roadsides and streams (Hall *et al.*, 2018), or as  
194        isolated trees within farm paddocks (Gibbons *et al.*, 2008).  
195        Human land-use consists of sheep and cattle grazing along with  
196        the cropping of wheat, oats, canola and legumes, often on a  
197        rotational basis (Bell & Moore, 2012). Average annual rainfall  
198        for the district is 492-648 mm per year, and daytime maximum  
199        spring temperatures are typically 16-27°C (Bureau of  
200        Meteorology, 2016).

201

202        Surveys were conducted within 24 individual farming  
203        landscapes (each 1 km diameter) across the study region, each  
204        containing both wooded cover and open farmland with a range  
205        in tree cover from ~5-22%, which is indicative of the region.

206 All sites within farms (n=8 per farm, n=192 in total) were  
207 selected such that they were similar in vegetation  
208 characteristics and topography. Major roads and river systems  
209 were avoided for consistency. For full details of methods, see  
210 Hall (2018).

211

## 212 **Sampling**

### 213 *Field sampling*

214 Non-bee pollinator insects (flies and wasps) were sampled  
215 using vane traps (SpringStar<sup>TM</sup> LLC, [www.springstar.net](http://www.springstar.net)),  
216 comprising a 64 oz (1892 ml) plastic collecting jar, screw top  
217 funnel and two interconnecting ultraviolet semitransparent  
218 polypropylene vanes, coloured either blue or yellow (Figs. S1b  
219 and S1c). These are known to be highly reflective when  
220 exposed to 365 nm filtered (UV-A), and midrange 302 nm  
221 filtered light (UV-B) (Stephen & Rao, 2005). Two pairs of  
222 traps (one blue and one yellow) were hung from a tree branch  
223 or pole at a height of approximately 2 m within the typical  
224 features present in the landscape. Thus, 2 pairs were deployed  
225 in roadsides with or without tree cover, 2 in creeks with or  
226 without tree cover, 2 in scattered trees within farmland and 2 in  
227 open farmland: n=108 wooded sites, n=84 open sites (see Hall  
228 *et al.*, 2019 for description of landscape-scale design, and Hall,  
229 2018 for full methods). Traps remained in place for seven days  
230 during the southern hemisphere spring months, from October to

231 November 2015. No pheromones, liquids or killing agents were  
 232 used in traps. Samples were collected after one week and stored  
 233 in 70% ethanol then pinned for identification. Identification of  
 234 flies and wasps to family-level was conducted using available  
 235 keys (Marshall, 2017; CSIRO, 2018). Other insect taxa  
 236 sampled were removed due to low sampling (e.g. Lepidoptera)  
 237 or because they (e.g. Coleoptera, Formicidae) were more likely  
 238 caught in traps during mass flight events related to breeding  
 239 (Sullivan, 1981; McHugh & Liebherr, 2009).

240

#### 241 *Database search*

242 To determine if vane traps were effective at sampling a  
 243 representative fly and wasp community within agriculturally  
 244 dominated landscapes containing both wooded and open  
 245 habitats, we compared our sampled fauna to families known to  
 246 occur within the study region. To do this, we generated an area  
 247 report using the *tools* dropdown menu in the Atlas of Living  
 248 Australia (ALA) spatial portal (Atlas of living Australia, 2019;  
 249 <https://spatial.ala.org.au/>), to incorporate a comparable area that  
 250 encapsulated our sampling area (~3,600 km<sup>2</sup>). We used only  
 251 spatially valid records (i.e. those where geographic location  
 252 was provided). We then compared families recorded on the  
 253 ALA to those sampled within our study. Note that data  
 254 provided in an area report could conceivably cover a timespan  
 255 from 1600 - 2018 AD, however no survey date was provided

256 for records with the report, so we must assume that most  
 257 records span a considerable time period (likely 1900 – present),  
 258 much longer than our two months of sampling conducted in a  
 259 single season. To investigate if non-bee pollinators in our  
 260 sampling area were also indicative of the whole region, we  
 261 conducted a wider search on the ALA (11,500 km<sup>2</sup>) which also  
 262 comprised forested and mountainous areas that were not  
 263 sampled in our study (Table S2, Fig. S2). Further, species  
 264 utilise resources at different times of the year, leading to  
 265 substantial temporal turnover in insect communities within an  
 266 area (Lambkin *et al.*, 2011; Thomsen *et al.*, 2016; Winfree *et*  
 267 *al.*, 2018). Thus, to help interpret differences in peak activity  
 268 periods for each fly and wasp family (and thus likelihood of  
 269 capture during our sampling period), records were taken from  
 270 the ALA database for the state of Victoria, grouped by month  
 271 in which individuals were reported on the database (Fig. S3).

272

### 273 **Statistical analyses**

274 We conducted three separate analyses corresponding to our  
 275 three main questions. First, to determine if vane traps were  
 276 effective at sampling the non-bee fauna compared with  
 277 historical records for these groups, we ran generalised linear  
 278 models in package *nlme* (Pinheiro *et al.*, 2018), assuming a  
 279 binomial distribution for presence/absence data. We compared  
 280 the number of fly and wasp families separately to those

281 recorded on the ALA database. We ran separate models  
 282 comparing presence of families (pooled richness) in different  
 283 coloured traps (blue and yellow), and within different habitat  
 284 types (open and wooded). Sites containing tree cover (roads  
 285 and creeks with tree cover and scattered tree sites) were  
 286 classified as ‘wooded’, whilst sites that lacked tree cover (roads  
 287 and creeks without tree cover and open farmland) were  
 288 classified as ‘open’. Overdispersion was checked using Pearson  
 289 residuals (Zuur *et al.*, 2013) and none was detected in any  
 290 model. For one model (wasp-colour preference), we fitted a  
 291 Firth’s bias-reduced logistic regression in package *logistf*  
 292 (Heinze *et al.*, 2018) due to BVTs containing all wasp families  
 293 sampled (separation problem, Heinze & Schemper, 2002). To  
 294 determine the level of overlap in families between the ALA,  
 295 BVTs and YVTs, we calculated the Morista-Horn index in  
 296 package *divo* (Pietrzak *et al.*, 2016). This quantifies the level of  
 297 overlap in families between sampling methods, giving a value  
 298 range between zero (no overlap) and one (perfect overlap).

299

300 Second, to determine if there was a difference in the  
 301 effectiveness of vane traps when sampling flies and wasps  
 302 using different colours and/or within open and wooded  
 303 environments, we ran generalised linear mixed models in  
 304 package *nlme* (Pinheiro *et al.*, 2018). We ran separate models  
 305 to test for differences in the richness and abundance of ‘all

306 individuals', 'all fly families' and 'all wasp families'. We  
 307 assumed a Poisson distribution for richness measures and a  
 308 negative binomial distribution for abundance data. Due to  
 309 clustering of sites within 1 km diameter landscapes and pairing  
 310 of different colour traps at each survey point, *landscape* and the  
 311 survey location (*pair*) were used as random effects in the  
 312 models.

313

314 Last, to test if the response of different fly and wasp families  
 315 were consistent, we tested differences in the abundance of each  
 316 family with >30 individuals sampled (see Table S2) between  
 317 trap colours and habitat types, using generalised linear mixed  
 318 models in the *nlme* package (Pinheiro *et al.*, 2018). We  
 319 assumed a Poisson distribution for all models, except for where  
 320 overdispersion was detected (Syrphidae, Tachinidae), where we  
 321 assigned a negative binomial distribution (Zuur *et al.*, 2013),  
 322 using the *MASS* package (Venables & Ripley, 2002). Again,  
 323 due to clustering of sites, *landscape* and the survey location  
 324 (*pair*) were used as random effects in the models. All statistical  
 325 analyses were conducted in R (v.3.5.1, R Core Team, 2018).

326

## 327 **RESULTS**

328 Overall, 3114 flies (Diptera) and 528 wasps (non-bee and non-  
 329 formicid Hymenoptera) were collected during the study,  
 330 comprising 19 families of flies and 16 families of wasps (Table

331 S1). Syrphidae was the most abundant family sampled with a  
332 total of 1396 individuals caught (45 % of the total abundance),  
333 including 87 % in BVTs.

334

335 For both orders, BVTs caught more insects with 67.5 % of the  
336 total abundance (68 % for flies and 63 % for wasps, Table S1).

337 Four fly families were found only in YVTs (Acroceridae,  
338 Bibionidae, Conopidae, Scatopsidae) whereas six fly or wasp  
339 families were captured only in BVTs (Diptera: Chironomidae,  
340 Sarcophagidae; Hymenoptera: Crabronidae, Gasteruptiidae,  
341 Mutillidae, Vespidae). Almost all of these families (only found  
342 in one colour) were sampled by a single individual (except  
343 Scatopsidae n=2, Mutillidae n=2, Vespidae n=6; Table S1).

344

345 In total, 1935 insects were caught in open areas, which  
346 represented 53% of the total abundance. Six families were only  
347 sampled in open habitat (Table S1). These open-associated  
348 families often only had one or two individuals (singletons or  
349 doubletons), however two families were found in greater  
350 numbers—Sphecidae (n=29) and Vespidae (n=6). Similarly, 14  
351 families were only found in wooded habitats, with only five  
352 families sampled having more than one or two individuals—  
353 Lauxaniidae (n=3), Mycetophilidae (n=7), Chrysididae (n=7),  
354 Pompilidae (n=5) and Scelionidae (n=4) (Table S1).

355

# 356 *Effectiveness of sampling using vane traps*

357 A total of 19 fly and 9 wasp families were recorded on the  
 358 ALA within our sampling area (Fig. 1). Combined BVTs and  
 359 YVTs sampled 19 families of flies, 12 of which were not  
 360 reported on the ALA (one was caught only in BVTs, four only  
 361 in YVTs and seven in both BVTs and YVTs). Twelve fly  
 362 families reported on the ALA were not caught in vane traps  
 363 during the study (Fig. 1). Overall, there was no difference in  
 364 the number of fly families sampled in our study in both BVTs  
 365 (Est = -0.52, SE = 0.51, P=0.31) and YVTs (Est = -0.26, SE =  
 366 0.52, P=0.61), or within wooded habitats (Est = -0.26, SE =  
 367 0.52, P=0.61; Figs. 1a, 1b). In contrast, fewer fly families were  
 368 collected in open habitats compared with historical ALA  
 369 records for the sample area (Est = -1.06, SE = 0.53, P=0.04;  
 370 Fig.1b). There was some overlap in families recorded on the  
 371 ALA and those sampled using BVTs and YVTs (flies: 30-40%,  
 372 wasps: ~55%, Figs. 1a, 1c). There was greater overlap based on  
 373 habitat for wasps (~66%) than flies (20-35%) (Figs. 1b, 1d).

374  
 375 BVTs had a higher probability of sampling wasp families  
 376 compared with all available records on the ALA for the  
 377 sampling area (Est = 3.26, SE = 1.56, P<0.01), however there  
 378 was no difference in the likelihood for other variables tested  
 379 (YVTs: Est = 0.78, SE = 0.76, P=0.28; Open: Est = 0.26, SE =  
 380 0.72, P=0.72; Wooded: Est = 0.85, SE = 0.77, P=0.27, Figs. 1c,



1d). Every family of wasp reported on the ALA (n=9) was also caught in BVTs, with seven additional families sampled using this colour that were not recorded on the ALA (Fig. 1c). Of the 16 families of wasps sampled, YVTs caught 12 families (Fig. 1c). Ten wasp families were sampled within open habitat types, including one unique family (Gasteruptionidae), while twelve families were collected in wooded habitats, including four unique families (Chrysididae, Evaniidae, Mutillidae, Scelionidae, Fig. 1d).

At the regional level encompassing our sampling area (11,500 km<sup>2</sup>), we found 39 fly and 13 wasp families recorded on the ALA (Fig. S2). Twenty fly families reported for the entire region on the ALA were not caught in vane traps during the study. Overall, fewer fly families were sampled in our study in both BVTs (Est = -1.99, SE = 0.53, P<0.01) and YVTs (Est = -1.78, SE = 0.53, P<0.01), along with both open (Est = -2.45, SE = 0.55, P<0.01) and wooded (Est = -1.78, SE = 0.53, P<0.01) habitat types compared with the wider region encompassing various habitat types and altitudinal gradients (Fig. S2). There was no difference in the number of wasp families recorded at the regional level on the ALA and those sampled in this study (BVTs: Est = 2.15, SE = 1.60, P=0.09; YVTs: Est = -0.33, SE = 0.84, P=0.69; Open: Est = -0.95, SE = 0.82, P=0.24; Wooded: Est = -0.37, SE = 0.86, P=0.67, Fig. S2). Every

406 family of wasp reported on the ALA (13 families) at this scale  
 407 was also caught in BVTs, with an additional family  
 408 (Mutillidae) found that was not recorded on the ALA. Both  
 409 BVTs and YVTs also sampled Bethylidae and Evaniidae,  
 410 which were not recorded on the ALA (Fig. S2).

411

412 The majority of fly families sampled using all methods showed  
 413 a peak activity period matching our sampling period of  
 414 October-November (Fig. S3a), however six families in  
 415 particular were either too rarely sampled to determine trends or  
 416 showed different peak activity periods (Anthomyidae,  
 417 Mycetophylidae, Platystomatidae, Sarcophagidae, Scatopsidae  
 418 and Sciaridae, Fig. S3a). Around half of all wasp families  
 419 recorded showed a similar activity peak to our sampling period,  
 420 while most others were more active during the summer months  
 421 (December-February) and Bethylidae had only low numbers  
 422 recorded on the ALA, all within the first six months of the year  
 423 (Fig. S3b).

424

#### 425 *Trap colour*

426 BVTs sampled greater average richness of all wasp and fly  
 427 families combined, and greater abundance of all individuals  
 428 across the study (Table 1, Figs. 2a, 2d). When modelled  
 429 separately, all fly families also had greater average richness and  
 430 abundance of individuals in BVTs (Table 1, Figs. 2b, 2e).

431 Wasp families were sampled equally in both colours (Table 1,  
432 Figs. 2c, 2f).

433

434 Of the nine families sampled with greater than 30 individuals,  
435 three were sampled more often in BVTs than YVTs (Diptera:  
436 Bombyliidae  $p<0.01$ , Syrphidae  $p<0.01$ , Hymenoptera:  
437 Scoliidae  $p<0.01$ ; Table 2). Four families were sampled more  
438 often in YVTs (Diptera: Muscidae  $p<0.01$ , Tachinidae  $p=0.03$ ,  
439 Therevidae  $p=0.02$ , Hymenoptera: Bethyridae  $p<0.01$ ). There  
440 was no difference between colours for Braconidae or Tiphidae  
441 (Hymenoptera) (Table 2).

442

#### 443 *Habitat*

444 Average richness of all fly and wasp families did not differ  
445 between habitat type, even when modelled separately (Table 1,  
446 Figs. 3a-3c). However, the abundance of all flies and wasps  
447 was greater in open habitats (Table 1, Fig. 3d). This trend  
448 occurred when also modelling fly abundance separately (Table  
449 1, Fig. 3e). Wasp abundance was sampled equally in both  
450 habitat types (Table 1, Fig. 3f).

451

452 Of the nine families sampled with greater than 30 individuals,  
453 three families were found more often in open areas  
454 (Bombyliidae  $p<0.01$ , Syrphidae  $p<0.01$  and Scoliidae  $p<0.01$ ),  
455 whilst three families were more often sampled in wooded areas

456 (Muscidae  $p=0.03$ , Bethylidae  $p<0.01$ , Braconidae  $p<0.01$ ;  
457 Table 2). Three families showed no preference for either  
458 habitat type (Tachinidae, Therevidae, Tiphidae; Table 2).

459

## 460 **DISCUSSION**

461 This study demonstrates that vane traps can be used to  
462 representatively sample the non-bee pollinator fauna among  
463 different habitat types within agricultural landscapes. At the  
464 scale of the sampling area, we collected and identified an equal  
465 number of families within a short sampling period to that  
466 recorded on an historical database. When broadening the scale  
467 to encompass the region, we found our sampling to be equal for  
468 wasps, but less representative for the fly fauna, potentially due  
469 to the inclusion of larger forest patches, waterbodies and  
470 altitudinal gradients at this scale. Large numbers of individuals  
471 were collected from multiple fly and wasp families across the  
472 survey period, with certain families known to be pollinators  
473 (e.g. Syrphidae: Armstrong, 1979; Bombyliidae: Larson *et al.*,  
474 2001; Scoliidae: Vithanage & Ironside, 1986) displaying a  
475 marked colour preference for BVTs. In contrast, family  
476 richness and abundance of insects was lower in YVTs, but this  
477 colour sampled some less common families important to the  
478 provision of multiple ecosystem services, including pollination  
479 (e.g. Acroceridae: Winterton, 2012; Bibionidae: D'Arcy-Burt &  
480 Blackshaw, 1991). These results, combined with similar

findings for the bee fauna within this region (Hall, 2018),  
indicate that vane traps are an important survey tool to  
understand the demography and distribution of pollinator  
communities.

# **Sampling effectiveness**

Whilst many studies have compared different trapping methods  
and tested colour attraction in pollinating insects (Kirk, 1984;  
Campbell & Hanula, 2007; Saunders & Luck, 2013), few have  
directly compared results to the known insect fauna of the  
study region in question. Here, we not only compare two  
colours of vane traps (blue and yellow), but also measure the  
effectiveness of this sampling method compared to a baseline  
of insect diversity within the same study area. The ALA is a  
comprehensive repository of environmental and biological  
information for Australia (Atlas of Living Australia, 2019). It  
has been used to inform plant suitability under climate-change  
(Booth *et al.*, 2012; Belbin & Williams, 2016), but such  
databases are still rarely used as a reference point for insect  
communities within a geographic area (but see Godefroid *et al.*,  
2015; De Palma *et al.*, 2017; Young *et al.*, 2017 for examples  
of effective use of historical data obtained through databases  
and museum specimens). If we are to understand the  
distribution and dynamics of pollinator communities, surveys  
should be conducted across large spatial scales and compared

506 with existing databases (Bartomeus *et al.*, 2018). Vane traps  
507 appear well suited for such comparison studies.

508

509 At the scale of the sampling area, vane traps sampled an  
510 equivalent diversity of fly and wasp families to the ALA  
511 database. In fact, the diversity of wasp families captured was  
512 greater than that recorded for the study area. The number of fly  
513 families sampled was lower than, but comparable to, the ALA  
514 and sampled some families not recorded on it. The lower  
515 number of fly families sampled in our study is likely due to the  
516 short sampling period. We sampled during the austral spring  
517 which may not align with the peak activity of certain families,  
518 such as Anthomyiidae and Platystomatidae, which may more  
519 likely be recorded in early summer or autumn (Fig. S3a).

520

521 When expanded to the regional scale, the number of wasp  
522 families remained the same, however a number of additional  
523 fly families were recorded on the ALA that were not sampled  
524 in vane traps. There are a number of possible reasons for this.  
525 First, as discussed above, the main activity period of those  
526 additional fly families is different from our sampling period  
527 (e.g. Chloropidae, Drosophilidae), or they have been rarely  
528 recorded (e.g. only one record on the ALA for Pediciidae, Fig.  
529 S3a). Second, such families may be more often found within  
530 mountainous habitats, intact forest or waterbodies (e.g.

531 Chloropidae, Drosophilidae, Empididae: Lambkin *et al.*, 2011;  
 532 Ephydriidae: Keiper *et al.*, 2002). These habitats were present  
 533 within the greater regional area but not our sampling area, thus  
 534 these families would be less likely to be found in more open,  
 535 low altitude plains that comprise the less diverse habitats of our  
 536 modified farm landscapes. Finally, families containing small-  
 537 sized insects seem under-represented in our sampling. Such  
 538 specimens were potentially missed when sorting traps due to  
 539 their small size. However, these tiny insects are also likely to  
 540 be missed in active surveys, such as sweep netting, and  
 541 potentially unidentifiable when liquids or sticking agents are  
 542 used with traps (Pickering & Stock, 2003).

543

#### 544 **Colour preference**

545 We found greater richness and abundance of non-bee  
 546 pollinators in BVTs than in YVTs, indicating a strong colour  
 547 preference to BVTs for most insect taxa sampled. This is  
 548 consistent with other vane trap studies targeting bees (Stephen  
 549 & Rao, 2005; Joshi *et al.*, 2015; Hall, 2018) and is the first  
 550 study comparing the effectiveness of these traps for sampling  
 551 many of the non-bee fauna. Studies using other survey methods  
 552 show some inconsistency in their ability to detect colour  
 553 preference. For instance, Saunders & Luck (2013) found that  
 554 yellow pan traps were preferred by pollinators (Hymenoptera  
 555 and Diptera) across various habitats, but catches in each colour

556 trap varied with habitat type. Similarly, Abrahamczyk *et al.*  
 557 (2010) found that in tropical and subtropical forests, yellow  
 558 traps sampled more non-formicid Hymenoptera than blue,  
 559 mainly due to a few families—Crabronidae, Ichneumonidae,  
 560 Nyssonidae and Pompilidae. However, Campbell & Hanula  
 561 (2007) found that blue pan traps were more effective than  
 562 yellow pan, standard Malaise or coloured Malaise traps in  
 563 sampling flower visiting insects in forested ecosystems. Such  
 564 inconsistencies may be attributable to differences in reflectance  
 565 of colours under different environmental conditions.

566

567 The UV-reflectance of traps possibly influences colour  
 568 preference by pollinating insects. Bees and hoverflies are  
 569 known to respond to the UV reflectance of flowers (Koski &  
 570 Ashman, 2014), and other vane trap studies have tested the  
 571 influence of reflectance on colour choice by bees (Stephen &  
 572 Rao, 2005; Joshi *et al.*, 2015). Studies using other trapping  
 573 methods have also tested UV reflectance, with varying results.  
 574 For instance, Sircom *et al.* (2018) found different coloured pan  
 575 traps used for bee surveys reflected to various degrees across  
 576 wavelengths, with yellow traps generally having higher  
 577 reflectance, while Shrestha *et al.* (2019) found hymenopterans  
 578 showed no preference based on reflectance, but dipterans were  
 579 generally more attracted to non-fluorescent than fluorescent  
 580 traps. The preference for BVTs has been recorded in bees



581 despite differing reports on the reflectance of each colour  
 582 (Stephen & Rao, 2005; Joshi *et al.*, 2015; Hall, 2018). In the  
 583 present study, multiple non-bee families similarly preferred  
 584 BVTs over YVTs, aligning with studies of bee communities.  
 585 However, Koski & Ashman (2014) show that fluorescent  
 586 patterning may be as important as colour, a feature present in  
 587 many flowers but not on any common trapping method. We  
 588 believe reflectance is an important quality in traps, and given  
 589 the consistent colour of vane traps, they are well suited to  
 590 sampling non-bee pollinators, particularly those that respond to  
 591 UV reflectance. Incorporating fluorescent pattern into trap  
 592 design could further improve their efficiency.

593

594 The ecological requirements of insects also likely affect  
 595 attraction to different coloured traps (Kirk, 1984; Saunders &  
 596 Luck, 2013). For instance, Syrphidae (hoverflies), which are  
 597 known to mimic bees (particularly *Apis mellifera* L.) in their  
 598 foraging behaviours (Knutson & Murphy, 1990; Golding &  
 599 Edmunds, 2000, Campos-Jiménez *et al.*, 2014), were sampled  
 600 more often in blue-coloured traps compared to yellow by  
 601 Campbell & Hanula (2007). This was supported by our finding  
 602 of a seven-fold increase in abundance of this family in BVTs.  
 603 In addition, Joshi *et al.* (2015) and Hall (2018) found that bees  
 604 were mostly attracted by BVTs, suggesting that, having similar  
 605 foraging behaviour to bees, syrphids may respond to the same

606 visual cues (Kevan & Baker, 1983; Laubertie *et al.*, 2006).  
 607 Similarly, Bombyliidae (bee flies) are also known to forage on  
 608 flowers (Kastinger & Weber, 2001; Larson *et al.*, 2001) and  
 609 have some behavioural similarities to both syrphids and bees  
 610 (Armstrong, 1979; Knutson & Murphy, 1990). Bombyliids also  
 611 show greater preference for blue flowers over yellow  
 612 (Kastinger & Weber, 2001) and have been more successfully  
 613 trapped in blue pan traps than in yellow in forested ecosystems  
 614 of south-eastern United States (Campbell & Hanula, 2007).  
 615 One wasp family, Scoliidae (flower wasps), known to pollinate  
 616 Macadamia and Orchids (Vithanage & Ironside 1986; Ciotek *et*  
 617 *al.*, 2006), was also associated with BVTs in our study,  
 618 presumably responding similarly to colour as the above taxa  
 619 (Vuts *et al.*, 2012).

620  
 621 In contrast, four families were found more often in YVTs.  
 622 Muscidae and Tachinidae are quite large, generalist groups of  
 623 flies, containing numerous species with different feeding  
 624 requirements, including predatory, blood-sucking, parasitic and  
 625 anthophilous behaviours (Larson *et al.*, 2001; Skevington &  
 626 Dang, 2002). Despite their apparent attraction to flowers,  
 627 especially nectar, very little is known about their interactions  
 628 with flowers (Larson *et al.*, 2001). Therevidae contains  
 629 numerous predatory flies (especially of coleopteran larvae),  
 630 which mainly avoid flowers, although a few species appear to

631 feed on nectar and insect secretions (Irwin & Lyneborg, 1989;  
632 Irwin 2001; Skevington & Dang, 2002; van Herk *et al.*, 2015).  
633 Bethyridae are known as beneficial insects and parasitoids of  
634 Lepidoptera and Coleoptera (Danthanarayana, 1980; Berry,  
635 1998). Smith *et al.* (2015) sampled them on yellow sticky traps,  
636 but other coloured traps were not used in this study. Little is  
637 known about any possible colour attraction for these two  
638 families.

639

640 Similarly, BVTs were particularly efficient at catching wasp  
641 families. The four families (Crabronidae, Gasteruptiidae,  
642 Mutillidae and Vespidae) only caught in BVTs comprise  
643 mostly predatory or parasitic species, but are also potential  
644 flower visitors, sometimes even foraging at night (Portman *et*  
645 *al.*, 2010; Wilson *et al.*, 2010). These may be missed when  
646 surveying only in daylight hours. A benefit of vane traps is that  
647 they can be left *in situ* night and day throughout the sampling  
648 period, maximizing the chances of sampling species with  
649 different foraging behaviours.

650

651 YVTs were effective at catching less common fly families,  
652 indicating both BVTs and YVTs might be required to  
653 comprehensively sample dipteran pollinators. Many of these  
654 species appear to require floral resources at least temporarily.  
655 For example, nectar collection by adult Chironomidae might

enhance their mating success (Larson *et al.*, 2001; Høye *et al.*, 2013). Many others are important pollinators as well as providing several additional ecosystem services, such as soil turnover, parasitism and scavenging (D'Arcy-Burt & Blackshaw, 1991; Larson *et al.*, 2001; Santos *et al.*, 2008; Winterton, 2012). These services may be particularly important, or indeed drive the response of taxa, in different habitat types.

#### **Habitat association**

Colour preference of pollinators has been compared in different habitat types across numerous studies. These include comparisons within different forested ecosystems (Campbell & Hanula, 2007; Abrahamczyk *et al.*, 2010), native bush and crop (Saunders & Luck, 2013) or sunny versus shaded (vegetated) sites (Hoback *et al.*, 1999). Such studies differ slightly from ours, in that wooded habitats here consisted of linear strips or scattered trees with an open understorey of coarse woody debris, while open habitats lacked trees and much of the woody litter.

In studies comparing open to closed habitats (forest, shade), microclimatic conditions, such as light, wind or humidity (Barradas & Fanjul, 1986), or reflectance and visibility of the coloured elements likely differ between habitat type (Abrahamczyk *et al.*, 2010). In contrast, due to the relatively

681 sparse nature of wooded habitats within farmland, we believe  
 682 differences between open and wooded habitats in our study are  
 683 likely driven by provision of different resources (floral, nesting  
 684 and prey) within each habitat type rather than microclimate or  
 685 trap visibility.

686

687 Many studies stress the importance of taking into account  
 688 habitat when choosing different trapping methods. Comparing  
 689 coloured pan traps in native bush and almond orchard,  
 690 Saunders & Luck (2013) highlighted the need to consider  
 691 habitat due to no individual colour adequately trapping target  
 692 insects across all habitats. Similarly, with sticky traps, Hoback  
 693 *et al.* (1999) found diversity measures were not affected by trap  
 694 colour but determined by position of traps (shaded or exposed).  
 695 In the present study, family richness in open or wooded habitats  
 696 did not differ, but abundance of non-bee pollinators was greater  
 697 in open habitat, likely due to the three most abundant flower-  
 698 visiting families preferring open areas.

699

700 For families present only in open habitats, several ecological  
 701 traits could explain their presence. Some families (Diptera:  
 702 Conopidae, Stratiomyidae; Hymenoptera: Crabronidae) are  
 703 known flower visitors and would therefore be present where the  
 704 flowering resources are most abundant (Conopidae: Armstrong,  
 705 1979; Stratiomyidae: Kevan & Baker, 1983; Crabronidae:

706 Portman *et al.*, 2010). The three families that were associated  
 707 most with BVTs (Bombyliidae, Syrphidae and Scoliidae) were  
 708 also sampled more often in open habitats. Just as Hall *et al.*  
 709 (2019) attributed the higher presence of bees in open habitats to  
 710 greater floral resources, the presence of these families in open  
 711 habitats could indicate behavioural similarities with bees.

712

713 Families more often sampled in wooded habitats were either  
 714 associated with YVTs (Muscidae, Bethyridae) or displayed no  
 715 colour preference (Braconidae). Overall, we found more unique  
 716 families in wooded habitat which we attribute to a greater  
 717 diversity of nest and perch sites, litter and food (e.g. insect and  
 718 arachnid prey). For example, Lauxaniidae feed on leaf litter and  
 719 are more likely found in the presence of shrubs, trees and  
 720 leaves than in grasslands (Merz, 2004). Other families predate  
 721 or parasitise caterpillars, orthopterans or spiders (Pompilidae:  
 722 Rayor, 1996; Acroceridae: Winterton, 2012). Several families  
 723 are known to parasitise solitary bee nests, wasp nests or  
 724 cockroach ootheca (Sacrophagidae: Skevington & Dang, 2002;  
 725 Evaniidae: Deyrup & Atkinson, 1993; Chrysididae:  
 726 Rosenheim, 1987). Others make their nests on wood or fungi  
 727 (Mycetophilidae: Madwar, 1937). These results further  
 728 highlight the need to sample across multiple habitat types, as  
 729 this might affect capture of certain taxa more than colour  
 730 preference.

731

732 Vane traps are effective at sampling a diverse fauna present in  
733 habitats associated with modified agricultural landscapes.  
734 However, other habitat types such as wetlands, forests or  
735 mountains were present within the wider region and appear to  
736 greatly increase diversity of fly families in particular (Fig S2).  
737 It is therefore important to conduct sampling across various  
738 habitat types if wanting to ensure a representative insect census  
739 of an entire region. Due to consistency and quality of colour  
740 and ease of installation, vane traps seem an ideal method for  
741 comparisons between habitats.

742

# **743 Conclusions and recommendations**

744 As with any one trapping technique, there are pros and cons to  
745 using vane traps for sampling insect fauna. One positive is that  
746 due to placement height and the absence of detergents, vane  
747 traps used here were less likely to be disturbed, drunk, or  
748 spilled by animals (wild or cattle), which may be a hazard  
749 when using other methods, such as pan traps. However, vane  
750 traps have at times been suspected of oversampling the bee  
751 community (Gibbs *et al.*, 2017). It is true that the number of  
752 individual bees captured in this region was relatively large for  
753 two months of sampling (Hall, 2018) and we had high  
754 abundance of certain families in this study, but not to the extent  
755 we would be concerned with oversampling. Regardless, caution

756 is needed to limit the impact that trapping will have on the  
 757 pollinator community. One possible solution would be to  
 758 sample for a shorter period but to increase the number of  
 759 sampling periods to capture seasonal changes (turnover) in the  
 760 pollinator community (Thomsen *et al.*, 2016; Winfree *et al.*,  
 761 2018). This would further increase the effectiveness of this  
 762 trapping method in sampling a representative pollinator insect  
 763 community.

764  
 765 A further limitation is the general dearth of knowledge of insect  
 766 pollinators, which makes it difficult to draw meaningful  
 767 ecological conclusions, given even basic distributional data is  
 768 often lacking for Australia. This highlights the importance of  
 769 using historical datasets as a baseline comparison to determine  
 770 how representative sampling is for an area (Bartomeus *et al.*,  
 771 2018). Taxonomic keys to the region are also limiting in that  
 772 they only go as far as family-level, and expertise on pollinators  
 773 is hard to come by (Batley & Hogendoorn, 2009). Although  
 774 identification at the species-level often allows for the greatest  
 775 precision (Lenat & Resh, 2001), family-level identification  
 776 provides better functional and behavioural indications than  
 777 order, which is sometimes used for such studies. Indeed, clear  
 778 trends appeared for three families of non-bee pollinators:  
 779 Bombyliidae, Syrphidae (Diptera) and Scoliidae  
 780 (Hymenoptera), which preferred BVTs here. However, it is



781 difficult to establish colour preferences for more generalist  
782 families within Diptera, which may include species with very  
783 different feeding behaviours (e.g. flesh flies, flower flies,  
784 predatory flies). In such cases, it would be ideal to use species-  
785 level classification where sufficient data exists.

786

787 Vane traps are an effective sampling method to capture a  
788 representative non-bee pollinator community, including flies  
789 and wasps. Whereas bees displayed clear preference for BVTs,  
790 results of this study suggest that in order to sample the  
791 complete pollinator community, a range of colours may be  
792 more suitable. Additionally, to capture greater numbers of other  
793 flower visiting insects such as butterflies or beetles, it might be  
794 necessary to combine this with other trapping techniques such  
795 as Malaise traps. Active techniques, such as sweep netting  
796 could be employed if wanting to answer more specific  
797 questions about the function of communities, but for pollinator  
798 census, vane traps are a cheap and efficient method that can be  
799 used to good effect across multiple habitats.

800

## 801 **ACKNOWLEDGEMENTS**

802 This work was conducted with financial assistance from the  
803 Holsworth Wildlife Research Endowment, awarded to MH  
804 during his PhD at La Trobe University. ER conducted later  
805 parts of this work as an intern at the Hawkesbury Institute for

806 the Environment, under the supervision of James Cook. Many  
807 thanks to all the generous landholders for their interest and  
808 access to properties, volunteers for assistance in conducting  
809 insect surveys and to Andrew Bennett and Dale Nimmo for  
810 invaluable supervision and support (of MH) throughout the  
811 field component of this study.  
812

# 813 REFERENCES

- 814 Abrahamczyk, S., Steudel, B. & Kessler, M. (2010). Sampling  
815 Hymenoptera along a precipitation gradient in tropical  
816 forests: the effectiveness of different coloured pan traps.  
817 *Entomologia Experimentalis et Applicata*, **137**, 262-268.  
818
- 819 Alomar, D., González-Estévez, M.A., Traveset, A. & Lázaro,  
820 A. (2018). The intertwined effects of natural vegetation,  
821 local flower community, and pollinator diversity on the  
822 production of almond trees. *Agriculture, Ecosystems and*  
823 *Environment*, **264**, 34-43.  
824
- 825 Armstrong, J.A. (1979). Biotic pollination mechanisms in the  
826 Australian flora—a review. *New Zealand Journal of*  
827 *Botany*, **17**, 467-508.  
828
- 829 Atlas of Living Australia (ALA). (2019). Spatial portal.  
830 Accessed 22 January 2019. <https://spatial.ala.org.au/>  
831
- 832 Barradas, V.L. & Fanjul, L. (1986). Microclimatic  
833 characterization of shaded and open-grown coffee (*Coffea*  
834 *arabica* L.) plantations in Mexico. *Agricultural and*  
835 *Forest Meteorology*, **38**, 101-112.  
836

- 837 Bartholomew, C.S. & Prowell, D. (2005). Pan compared to  
838 malaise trapping for bees (Hymenoptera: Apoidea) in a  
839 longleaf pine savanna. *Journal of the Kansas*  
840 *Entomological Society*, **78**, 390-392.
- 841
- 842 Bartomeus, I., Stavert, J.R., Ward, D. & Aguado, O. (2018).  
843 Historical collections as a tool for assessing the global  
844 pollination crisis. *Philosophical Transactions of the*  
845 *Royal Society B*, **374**, 20170389.
- 846
- 847 Batley, M. & Hogendoorn, K. (2009). Diversity and  
848 conservation status of native Australian bees. *Apidologie*,  
849 **40**, 347-354.
- 850
- 851 Belbin, L. & Williams, K.J. (2016). Towards a national bio-  
852 environmental data facility: experiences from the Atlas of  
853 Living Australia. *International Journal of Geographical*  
854 *Information Science*, **30**, 108-125.
- 855
- 856 Bell, L.W. & Moore, A.D. (2012) Integrated crop–livestock  
857 systems in Australian agriculture: trends, drivers and  
858 implications. *Agricultural Systems*, **111**, 1–12.
- 859
- 860 Berry, J.A. (1998). The bethyline species (Hymenoptera:  
861 Bethyridae: Bethylinae) imported into New Zealand for

862 biological control of pest leafrollers. *New Zealand*  
863 *Journal of Zoology*, **25**, 329-333.

864

865 Booth, T.H., Williams, K.J. & Belbin, L. (2012). Developing  
866 biodiverse plantings suitable for changing climatic  
867 conditions 2: Using the Atlas of Living Australia.  
868 *Ecological Management & Restoration*, **13**, 274-281.

869

870 Brittain, C., Williams, N., Kremen, C. & Klein, A.M. (2013).  
871 Synergistic effects of non-Apis bees and honey bees for  
872 pollination services. *Proceedings of the Royal Society of*  
873 *London B: Biological Sciences*, **280**, 20122767.

874

875 Bureau of Meteorology (2016). Climate data online. Accessed  
876 June 2016. <http://www.bom.gov.au/climate/data/>

877

878 Campbell, J.W. & Hanula, J.L. (2007) Efficiency of malaise  
879 traps and colored pan traps for collecting flower visiting  
880 insects from three forested ecosystems. *Journal of Insect*  
881 *Conservation*, **11**, 399–408.

882

883 Campbell, J.W., Irvin, A., Irvin, H., Stanley-Stahr, C. & Ellis,  
884 J.D. (2016). Insect visitors to flowering buckwheat,  
885 *Fagopyrum esculentum* (Polygonales: Polygonaceae), in  
886 north-central Florida. *Florida Entomologist*, **99**, 264-268.

887

888 Campos-Jiménez, J., Martínez, A.J., Golubov, J., García-  
889 Franco, J. & Ruiz-Montiel, C. (2014). Foraging behavior  
890 of *Apis mellifera* (Hymenoptera: Apidae) and  
891 *Lycastirrhyncha nitens* (Diptera: Syrphidae) on  
892 *Pontederia sagittata* (Commelinales: Pontederiaceae) on a  
893 disturbed site. *Florida Entomologist*, **97**, 217-223.

894

895 Ciotek, L., Giorgis, P., Benitez-Vieyra, S., & Cocucci, A. A.  
896 (2006). First confirmed case of pseudocopulation in  
897 terrestrial orchids of South America: pollination of  
898 *Geoblasta pennicillata* (Orchidaceae) by *Campsomeris*  
899 *bistricmacula* (Hymenoptera, Scoliidae). *Flora*, **201**, 365-  
900 369.

901

902 CSIRO (2018). Australian Insect Families: Hymenoptera,  
903 viewed 24 November 2018,  
904 [http://anic.ento.csiro.au/insectfamilies/key.aspx?OrderID](http://anic.ento.csiro.au/insectfamilies/key.aspx?OrderID=27447andPageID=identifyandKeyID=27)  
905 [=27447andPageID=identifyandKeyID=27](http://anic.ento.csiro.au/insectfamilies/key.aspx?OrderID=27447andPageID=identifyandKeyID=27).

906

907 D'Arcy-Burt, S. & Blackshaw, R.P. (1991). Bibionids (Diptera:  
908 Bibionidae) in agricultural land: a review of damage,  
909 benefits, natural enemies and control. *Annals of Applied*  
910 *Biology*, **118**, 695-708.

911

- 912 Danthanarayana, W. (1980). Parasitism of the light brown  
913 apple moth, *Epiphyas Postvittana* (Walker), by its larval  
914 ectoparasite, *Goniozus Jacintae* Farrugia (Hymenoptera:  
915 Bethyridae), in natural populations in Victoria. *Australian*  
916 *Journal of Zoology*, **28**, 685-692.
- 917
- 918 De Palma, A., Kuhlmann, M., Bugter, R., Ferrier, S., Hoskins,  
919 A.J., Potts, S.G., Roberts, S.P., Schweiger, O. & Purvis,  
920 A. (2017). Dimensions of biodiversity loss: spatial  
921 mismatch in land use impacts on species, functional and  
922 phylogenetic diversity of European bees. *Diversity and*  
923 *Distributions*, **23**, 1435-1446.
- 924
- 925 Desouhant, E., Navel, S., Foubert, E., Fischbein, D., Théry, M.  
926 & Bernstein, C. (2010). What matters in the associative  
927 learning of visual cues in foraging parasitoid wasps:  
928 colour or brightness?. *Animal Cognition*, **13**, 535-543.
- 929
- 930 Deyrup, M., & Atkinson, T. H. (1993). Survey of evaniid  
931 wasps (Hymenoptera: Evaniidae) and their cockroach  
932 hosts (Blattodea) in a natural Florida habitat. *Florida*  
933 *Entomologist*, **76**, 589-593.
- 934
- 935 Environmental Conservation Council (2001). Box-Ironbark  
936 forests and woodlands investigation: final report.

937 Environmental Conservation Council, East Melbourne,  
938 Victoria.  
939  
940 Gibbons, P., Lindenmayer, D.B., Fischer, J., Manning, A.D.,  
941 Weinberg, A., Seddon, J., Ryan, P. & Barrett, G. (2008).  
942 The future of scattered trees in agricultural landscapes.  
943 *Conservation Biology*, **22**, 1309–1319.  
944  
945 Gibbs, J., Joshi, N.K., Wilson, J.K., Rothwell, N.L., Powers,  
946 K., Haas, M., Gut, L., Biddinger, D.J. & Isaacs, R.  
947 (2017). Does passive sampling accurately reflect the bee  
948 (Apoidea: Anthophila) communities pollinating apple and  
949 sour cherry orchards? *Environmental Entomology*, **46**,  
950 579–588.  
951  
952 Godefroid, M., Cruaud, A., Rossi, J.P. & Rasplus, J.Y. (2015).  
953 Assessing the risk of invasion by Tephritid fruit flies:  
954 intraspecific divergence matters. *PloS one*, **10**, e0135209.  
955  
956 Golding, Y.C. & Edmunds, M. (2000). Behavioural mimicry of  
957 honeybees (*Apis mellifera*) by droneflies (Diptera:  
958 Syrphidae: *Eristalis* spp.). *Proceedings of the Royal*  
959 *Society of London B: Biological Sciences*, **267**, 903-909.  
960



961 Hall, M. (2018). Blue and yellow vane traps differ in their  
 962 sampling effectiveness for wild bees in both open and  
 963 wooded habitats. *Agricultural and Forest Entomology*,  
 964 **20**, 487-495.  
 965  
 966 Hall, M.A., Nimmo, D.G., Cunningham, S.A., Walker, K. &  
 967 Bennett, A.F. (2019). The response of wild bees to tree  
 968 cover and rural land use is mediated by species' traits.  
 969 *Biological Conservation*, **231**, 1-12.  
 970  
 971 Hall, M., Nimmo, D., Watson, S. & Bennett, A.F. (2018).  
 972 Linear habitats in rural landscapes have complementary  
 973 roles in bird conservation. *Biodiversity and Conservation*,  
 974 **27**, 2605-2623.  
 975  
 976 Heard, T.A. (1999). The role of stingless bees in crop  
 977 pollination. *Annual Review of Entomology*, **44**, 183-206.  
 978  
 979 Heinze, G. & Schemper, M. (2002). A solution to the problem  
 980 of separation in logistic regression. *Statistics in Medicine*,  
 981 **21**, 2409-2419.  
 982  
 983 Heinze, G., Ploner, M., Dunkler, D. & Southworth, H. (2018).  
 984 *logistf: Firth's bias reduced logistic regression*. R

985 package version, 1.23.  
 986 <https://rdrr.io/cran/logistf/man/logistf.html>  
 987  
 988 Hoback, W.W., Svatos, T.M., Spomer, S.M. & Higley, L.G.  
 989 (1999). Trap color and placement affects estimates of  
 990 insect family-level abundance and diversity in a Nebraska  
 991 salt marsh. *Entomologia Experimentalis et Applicata*, **91**,  
 992 393-402.  
 993  
 994 Høye, T.T., Post, E., Schmidt, N.M., Trøjelsgaard, K. &  
 995 Forchhammer, M.C. (2013). Shorter flowering seasons  
 996 and declining abundance of flower visitors in a warmer  
 997 Arctic. *Nature Climate Change*, **3**, 759-763.  
 998  
 999 Inouye, D.W. & Pyke, G.H. (1988). Pollination biology in the  
 1000 Snowy Mountains of Australia: comparisons with  
 1001 montane Colorado, USA. *Australian Journal of Ecology*,  
 1002 **13**, 191-205.  
 1003  
 1004 Irwin, M.E. (2001). Species composition and seasonal flight  
 1005 periodicity of stiletto flies (Diptera: Therevidae)  
 1006 occurring along the Kuiseb River, Gobabeb, Namibia.  
 1007 *Cimbebasia*, **17**, 169-175.  
 1008

1009 Irwin, M.E. & Lyneborg, L. (1989). Family Therevidae. In  
1010 *Catalog of Diptera of the Australasian and Oceanian*  
1011 *Regions*. (Ed. NL Evenhuis.) pp. 353–358.  
1012  
1013 Joshi, N.K., Leslie, T., Rajotte, E.G., Kammerer, M.A., Otieno,  
1014 M. & Biddinger, D.J. (2015). Comparative trapping  
1015 efficiency to characterize bee abundance, diversity, and  
1016 community composition in apple orchards. *Annals of the*  
1017 *Entomological Society of America*, **108**, 785-799.  
1018  
1019 Kastinger, C. & Weber, A. (2001). Bee-flies (Bombylius spp.,  
1020 Bombyliidae, Diptera) and the pollination of flowers.  
1021 *Flora*, **196**, 3-25.  
1022  
1023 Keiper, J. B., Walton, W. E., & Foote, B. A. (2002). Biology  
1024 and ecology of higher Diptera from freshwater wetlands.  
1025 *Annual Review of Entomology*, **47**, 207-232.  
1026  
1027 Kennedy, C.M., Lonsdorf, E., Neel, M.C., Williams, N.M.,  
1028 Ricketts, T.H., Winfree, R., Bommarco, R., Brittain, C.,  
1029 Burley, A.L., Cariveau, D. & Carvalheiro, L.G. (2013). A  
1030 global quantitative synthesis of local and landscape  
1031 effects on wild bee pollinators in agroecosystems.  
1032 *Ecology Letters*, **16**, 584-599.  
1033

1034 Kevan, P.G. & Baker, H.G. (1983). Insects as flower visitors  
1035 and pollinators. *Annual Review of Entomology*, **28**, 407-  
1036 453.

1037

1038 Kimoto, C., DeBano, S.J., Thorp, R.W., Rao, S. & Stephen,  
1039 W.P. (2012). Investigating temporal patterns of a native  
1040 bee community in a remnant North American bunchgrass  
1041 prairie using blue vane traps. *Journal of Insect Science*,  
1042 **12**, 1–23.

1043

1044 Kirk, W.D. (1984). Ecologically selective coloured traps.  
1045 *Ecological Entomology*, **9**, 35-41.

1046

1047 Kitching, R.L., Li, D. & Stork, N.E. (2001). Assessing  
1048 biodiversity 'sampling packages': how similar are  
1049 arthropod assemblages in different tropical rainforests?.  
1050 *Biodiversity and Conservation*, **10**, 793-813.

1051

1052 Klein, A.M., Vaissiere, B.E., Cane, J.H., Steffan-Dewenter, I.,  
1053 Cunningham, S.A., Kremen, C. & Tscharntke, T. (2006).  
1054 Importance of pollinators in changing landscapes for  
1055 world crops. *Proceedings of the Royal Society B:*  
1056 *Biological Sciences*, **274**, 303-313.

1057

- 1058 Knutson, L.V. & Murphy, W.L. (1990). Chapter 8: Insects:  
1059 Diptera (Flies). In Morse, R.A. and Nowogrodzki, R.  
1060 (eds). *Honey bee pests, predators, and diseases* (2<sup>nd</sup> Ed).  
1061 Cornell University Press.  
1062
- 1063 Koh, I., Lonsdorf, E.V., Williams, N.M., Brittain, C., Isaacs,  
1064 R., Gibbs, J. & Ricketts, T.H. (2016). Modeling the  
1065 status, trends, and impacts of wild bee abundance in the  
1066 United States. *Proceedings of the National Academy of*  
1067 *Sciences*, **113**, 140-145.  
1068
- 1069 Koski, M.H. & Ashman, T.L. (2014). Dissecting pollinator  
1070 responses to a ubiquitous ultraviolet floral pattern in the  
1071 wild. *Functional Ecology*, **28**, 868-877.  
1072
- 1073 Kremen, C., Williams, N.M. & Thorp, R.W. (2002). Crop  
1074 pollination from native bees at risk from agricultural  
1075 intensification. *Proceedings of the National Academy of*  
1076 *Sciences*, **99**, 16812-16816.  
1077
- 1078 Lambkin, C.L., Boulter, S.L., Starick, N.T., Cantrell, B.K.,  
1079 Bickel, D.J., Wright, S.G., Power, N., Schutze, M.K.,  
1080 Turco, F., Nakamura, A. & Burwell, C.J. (2011).  
1081 Altitudinal and seasonal variation in the family-level  
1082 assemblages of flies (Diptera) in an Australian

1083           subtropical rainforest: one hundred thousand and  
1084           counting!. *Memoirs of the Queensland Museum*, **55**, 315-  
1085           331.

1086

1087   Larson, B. M. H., Kevan, P. G., & Inouye, D. W. (2001). Flies  
1088           and flowers: taxonomic diversity of anthophiles and  
1089           pollinators. *The Canadian Entomologist*, **133**, 439-465.

1090

1091   Larsson, M. & Franzen, M. (2008). Estimating the population  
1092           size of specialised solitary bees. *Ecological Entomology*,  
1093           **33**, 232-238.

1094

1095   Laubertie, E.A., Wratten, S.D. & Sedcole, J.R. (2006). The role  
1096           of odour and visual cues in the pan-trap catching of  
1097           hoverflies (Diptera: Syrphidae). *Annals of Applied*  
1098           *Biology*, **148**, 173-178.

1099

1100   Lefebvre, V., Villemant, C., Fontaine, C. & Daugeron, C.  
1101           (2018). Altitudinal, temporal and trophic partitioning of  
1102           flower-visitors in Alpine communities. *Scientific Reports*,  
1103           **8**, 4706.

1104

1105   Lenat, D.R. & Resh, V.H. (2001). Taxonomy and stream  
1106           ecology—the benefits of genus- and species-level

- 1107 identifications. *Journal of the North American*  
1108 *Benthological Society*, **20**, 287-298.
- 1109
- 1110 Lentini, P.E., Martin, T.G., Gibbons, P., Fischer, J. &  
1111 Cunningham, S.A. (2012) Supporting wild pollinators in  
1112 a temperate agricultural landscape: maintaining mosaics  
1113 of natural features and production. *Biological*  
1114 *Conservation*, **149**, 84–92.
- 1115
- 1116 McCravy, K. (2018). A review of sampling and monitoring  
1117 methods for beneficial arthropods in agroecosystems.  
1118 *Insects*, **9**, 170.
- 1119
- 1120 McHugh, J.V. & Liebherr, J.K., (2009). Coleoptera:(beetles,  
1121 weevils, fireflies). *In* Encyclopedia of Insects (2<sup>nd</sup> Ed),  
1122 pp.183-201.
- 1123
- 1124 Madwar, S. (1937). I-Biology and morphology of the immature  
1125 stages of Mycetophilidae (Diptera, Nematocera).  
1126 *Philosophical Transactions of the Royal Society of*  
1127 *London. Series B, Biological Sciences*, **227**, 1-110.
- 1128
- 1129 Marshall, S.A. (2017). Key to Diptera Families - Adults. *In*  
1130 Kirk-Spriggs, A.H. and Sinclair, B.J. Manual of  
1131 Afrotropical Diptera. Volume 1. Introductory chapters

1132           and keys to Diptera families. Suricata 4. South African  
1133           National Biodiversity Institute, Pretoria, pp. 267-356.  
1134  
1135   Merz, B. (2004). Revision of the *Minettia fasciata* species-  
1136           group (Diptera, Lauxaniidae). *Revue Suisse de Zoologie*,  
1137           **111**, 183-211.  
1138  
1139   Missa, O., Basset, Y., Alonso, A., Miller, S.E., Curletti, G., De  
1140           Meyer, M., Eardley, C., Mansell, M.W. & Wagner, T.  
1141           (2009). Monitoring arthropods in a tropical landscape:  
1142           relative effects of sampling methods and habitat types on  
1143           trap catches. *Journal of Insect Conservation*, **13**, 103.  
1144  
1145   Morse, R.A. & Calderone, N.W. (2000). The value of honey  
1146           bees as pollinators of US crops in 2000. *Bee Culture*,  
1147           **128**, 1-15.  
1148  
1149   Ollerton, J. (2017). Pollinator diversity: distribution, ecological  
1150           function, and conservation. *Annual Review of Ecology*,  
1151           *Evolution, and Systematics*, **48**, 353-376.  
1152  
1153   Pickering, C.M. & Stock, M. (2003). Insect colour preference  
1154           compared to flower colours in the Australian Alps.  
1155           *Nordic Journal of Botany*, **23**, 217-223.  
1156



1157 Pietrzak, M., Seweryn, M. & Rempala, G. (2016). *divo: tools*  
1158 *for analysis of diversity and similarity in biological*  
1159 *systems*. R package version 0.1.2, [http://CRAN.R-](http://CRAN.R-project.org/package=divo)  
1160 [project.org/package=divo](http://CRAN.R-project.org/package=divo).  
1161  
1162 Pinheiro, J., Bates, D., DebRoy, S., Sarkar, D. & R Core Team  
1163 (2018). *nlme: linear and nonlinear mixed effects models*.  
1164 R package version 3.1-137, [https://CRAN.R-](https://CRAN.R-project.org/package=nlme)  
1165 [project.org/package=nlme](https://CRAN.R-project.org/package=nlme).  
1166  
1167 Portman, S.L., Frank, J. H., McSorley, R., & Leppla, N. C.  
1168 (2010). Nectar-seeking and host-seeking by *Larra bicolor*  
1169 (Hymenoptera: Crabronidae), a parasitoid of *Scapteriscus*  
1170 mole crickets (Orthoptera: Gryllotalpidae).  
1171 *Environmental Entomology*, **39**, 939-943.  
1172  
1173 Potts, S.G., Imperatriz-Fonseca, V., Ngo, H.T., Biesmeijer,  
1174 J.C., Breeze, T.D., Dicks, L.V., Garibaldi, L.A., Hill, R.,  
1175 Settele, J. & Vanbergen, A.J. (2016). The assessment  
1176 report on pollinators, pollination and food production:  
1177 summary for policymakers. Secretariat of the  
1178 Intergovernmental Science-Policy Platform on  
1179 Biodiversity and Ecosystem Services, Bonn, Germany..  
1180

1181 R Core Team (2018). *R: A Language and Environment for*  
1182 *Statistical Computing*. R Foundation for Statistical  
1183 Computing, Vienna, Austria.  
1184  
1185 Rader, R., Bartomeus, I., Garibaldi, L.A., Garratt, M.P.,  
1186 Howlett, B.G., Winfree, R., Cunningham, S.A., Mayfield,  
1187 M.M., Arthur, A.D., Andersson, G.K. & Bommarco, R.  
1188 (2016). Non-bee insects are important contributors to  
1189 global crop pollination. *Proceedings of the National*  
1190 *Academy of Sciences*, **113**, 146-151.  
1191  
1192 Rayor, L.S. (1996). Attack strategies of predatory wasps  
1193 (Hymenoptera: Pompilidae; Sphecidae) on colonial orb  
1194 web-building spiders (Araneidae: Metepeira incrassata).  
1195 *Journal of the Kansas Entomological Society*, **69**, 67-75.  
1196  
1197 Rosenheim, J.A. (1987). Host location and exploitation by the  
1198 cleptoparasitic wasp *Argochrysis armilla*: the role of  
1199 learning (Hymenoptera: Chrysididae). *Behavioral*  
1200 *Ecology and Sociobiology*, **21**, 401-406.  
1201  
1202 Santos, A.M., Serrano, J.C., Couto, R.M., Rocha, L.S., Mello-  
1203 Patiu, C.A. & Garófalo, C.A. (2008). Conopid flies  
1204 (Diptera: Conopidae) parasitizing *Centris* (Heterocentris)

- 1205            analis (Fabricius) (Hymenoptera: Apidae, Centridini).
- 1206            *Neotropical Entomology*, **37**, 606-608.
- 1207
- 1208    Saunders, M.E. & Luck, G.W. (2013) Pan trap catches of
- 1209            pollinator insects vary with habitat. *Australian Journal of*
- 1210            *Entomology*, **52**, 106–113.
- 1211
- 1212    Shrestha, M., Garcia, J.E., Chua, J.H., Howard, S.R.,
- 1213            Tscheulin, T., Dorin, A., Nielsen, A. & Dyer, A.G.
- 1214            (2019). Fluorescent pan traps affect the capture rate of
- 1215            insect orders in different ways. *Insects*, **10**, 40.
- 1216
- 1217    Sircom, J., Jothi, G.A. & Pinksen, J. (2018). Monitoring bee
- 1218            populations: are eusocial bees attracted to different
- 1219            colours of pan trap than other bees?. *Journal of Insect*
- 1220            *Conservation*, **22**, 433-441.
- 1221
- 1222    Skevington, J.H. & Dang, P.T. (2002). Exploring the diversity
- 1223            of flies (Diptera). *Biodiversity*, **3**, 3-27.
- 1224
- 1225    Smith, I.M., Hoffmann, A.A. & Thomson, L.J. (2015). Ground
- 1226            cover and floral resources in shelterbelts increase the
- 1227            abundance of beneficial hymenopteran families.
- 1228            *Agricultural and Forest Entomology*, **17**, 120-128.
- 1229

- 1230 Stavert, J.R., Pattemore, D.E., Bartomeus, I., Gaskett, A.C. &  
1231 Beggs, J.R. (2018). Exotic flies maintain pollination  
1232 services as native pollinators decline with agricultural  
1233 expansion. *Journal of Applied Ecology*, **55**, 1737-1746.  
1234  
1235 Stephen, W.P. & Rao, S. (2005) Unscented color traps for non-  
1236 Apis bees (Hymenoptera: Apiformes). *Journal of the*  
1237 *Kansas Entomological Society*, **78**, 373–380.  
1238  
1239 Stephen, W.P. & Rao, S. (2007) Sampling native bees in  
1240 proximity to a highly competitive food resource  
1241 (Hymenoptera: Apiformes). *Journal of the Kansas*  
1242 *Entomological Society*, **80**, 369–376.  
1243  
1244 Sullivan, R. (1981). Insect swarming and mating. *The Florida*  
1245 *Entomologist*, **64**, 44-65.  
1246  
1247 Taki, H., Murao, R., Mitai, K. & Yamaura, Y. (2018). The  
1248 species richness/abundance–area relationship of bees in  
1249 an early successional tree plantation. *Basic and Applied*  
1250 *Ecology*, **26**, 64-70.  
1251  
1252 Thomsen, P.F., Jørgensen, P.S., Bruun, H.H., Pedersen, J.,  
1253 Riis-Nielsen, T., Jonko, K., Słowińska, I., Rahbek, C. &  
1254 Karsholt, O. (2016). Resource specialists lead local insect

1255 community turnover associated with temperature–  
 1256 analysis of an 18-year full-seasonal record of moths  
 1257 and beetles. *Journal of Animal Ecology*, **85**, 251-261.  
 1258  
 1259 Thomson, D.M. (2019). Effects of long-term variation in  
 1260 pollinator abundance and diversity on reproduction of a  
 1261 generalist plant. *Journal of Ecology*, **107**, 491-502.  
 1262  
 1263 van Herk, W.G., Vernon, R.S., Cronin, E.M.L. & Gaimari, S.D.  
 1264 (2015). Predation of *Thereva nobilitata* (Fabricius)  
 1265 (Diptera: Therevidae) on *Agriotes obscurus* L.  
 1266 (Coleoptera: Elateridae). *Journal of Applied Entomology*,  
 1267 **139**, 154-157.  
 1268  
 1269 Venables, W.N. & Ripley, B.D. (2002) Modern applied  
 1270 statistics with S. (4th Ed). Springer, New York.  
 1271  
 1272 Vithanage, V., & Ironside, D. A. (1986). The insect pollinators  
 1273 of macadamia and their relative importance. *Journal of*  
 1274 *the Australian Institute of Agricultural Science*, **52**, 155-  
 1275 160.  
 1276  
 1277 Vrdoljak, S.M. & Samways, M.J. (2012). Optimising coloured  
 1278 pan traps to survey flower visiting insects. *Journal of*  
 1279 *Insect Conservation*, **16**, 345-354.

1280

1281 Vuts, J., Razov, J., Kaydan, M.B. & Tóth, M. (2012). Visual

1282 and olfactory cues for catching parasitic wasps

1283 (Hymenoptera: Scoliidae). *Acta Zoologica Academiae*

1284 *Scientiarum Hungaricae*, **58**, 351-359.

1285

1286 Westphal, C., Bommarco, R., Carré, G., Lamborn, E., Morison,

1287 N., Petanidou, T., Potts, S.G., Roberts, S.P.,

1288 Szentgyörgyi, H., Tscheulin, T. & Vaissière, B.E. (2008).

1289 Measuring bee diversity in different European habitats

1290 and biogeographical regions. *Ecological Monographs*,

1291 **78**, 653-671.

1292

1293 Wilson, J.S., Williams, K.A., Tanner, D.A. & Pitts, J.P. (2010).

1294 Nectaring by nocturnal velvet ants (Hymenoptera:

1295 Mutillidae). *The Southwestern Naturalist*, **55**, 441-443.

1296

1297 Winfree, R., Reilly, J.R., Bartomeus, I., Cariveau, D.P.,

1298 Williams, N.M. & Gibbs, J. (2018). Species turnover

1299 promotes the importance of bee diversity for crop

1300 pollination at regional scales. *Science*, **359**, 791-793.

1301

1302 Winterton, S.L. (2012). Review of Australasian spider flies

1303 (Diptera, Acroceridae) with a revision of *Panops*

1304 Lamarck. *ZooKeys*, **172**, 7-75.

1305

1306 Young, B.E., Auer, S., Ormes, M., Rapacciuolo, G.,

1307 Schweitzer, D. & Sears, N. (2017). Are pollinating hawk

1308 moths declining in the Northeastern United States? An

1309 analysis of collection records. *PloS one*, **12**, e0185683.

1310

1311 Zhang, W., Ricketts, T.H., Kremen, C., Carney, K. & Swinton,

1312 S.M. (2007). Ecosystem services and dis-services to

1313 agriculture. *Ecological Economics*, **64**, 253-260.

1314

1315 Zuur, A.F., Hilbe, J.M. & Ieno, E.N. (2013). A beginner's

1316 Guide to GLM and GLMM with R. Highland Statistics

1317 Limited, U.K.

## TABLES AND FIGURES

Table 1: Differences by trap colour and habitat type of the richness of all fly (Diptera) and wasp (Hymenoptera) families and abundance of individuals, as well as the richness and abundance of each order when modelled separately. Bold values indicate a significant response. Reference categories used were *blue* for colour and *open* for habitat.

|                     |         | Estimate | Std. Error | z value | Pr(> z )        |
|---------------------|---------|----------|------------|---------|-----------------|
| <i>Richness</i>     | Colour  | -0.22    | 0.06       | -3.38   | <b>&lt;0.01</b> |
|                     | Habitat | -0.01    | 0.07       | -0.20   | 0.84            |
| <i>Abundance</i>    | Colour  | -0.79    | 0.10       | -7.80   | <b>&lt;0.01</b> |
|                     | Habitat | -0.35    | 0.11       | -3.06   | <b>&lt;0.01</b> |
| <i>Fly richness</i> | Colour  | -0.34    | 0.08       | -4.29   | <b>&lt;0.01</b> |



|                       |         |       |      |       |                 |
|-----------------------|---------|-------|------|-------|-----------------|
|                       | Habitat | -0.10 | 0.08 | -1.28 | 0.20            |
| <i>Fly abundance</i>  | Colour  | -0.87 | 0.11 | -8.23 | <b>&lt;0.01</b> |
|                       | Habitat | -0.43 | 0.12 | -3.48 | <b>&lt;0.01</b> |
| <i>Wasp richness</i>  | Colour  | -0.07 | 0.13 | -0.57 | 0.57            |
|                       | Habitat | 0.13  | 0.14 | 0.92  | 0.36            |
| <i>Wasp abundance</i> | Colour  | -0.27 | 0.18 | -1.52 | 0.13            |
|                       | Habitat | -0.02 | 0.19 | -0.09 | 0.93            |

---

Table 2: Differences by trap colour and habitat type of the abundance of individuals from fly (Diptera) and wasp (Hymenoptera) families sampled with >30 individuals. Bold values indicate a significant response. Reference categories used were *blue* for colour and *open* for habitat.

| Order          | Family             |         | Estimate | Std. Error | z value | Pr(> z )        |
|----------------|--------------------|---------|----------|------------|---------|-----------------|
| <i>Diptera</i> | <i>Bombyliidae</i> | Colour  | -2.79    | 0.24       | -11.47  | <b>&lt;0.01</b> |
|                |                    | Habitat | -1.21    | 0.31       | -3.88   | <b>&lt;0.01</b> |
|                | <i>Muscidae</i>    | Colour  | 1.17     | 0.31       | 3.82    | <b>&lt;0.01</b> |
|                |                    | Habitat | 1.24     | 0.58       | 2.15    | <b>0.03</b>     |
|                | <i>Syrphidae</i>   | Colour  | -2.04    | 0.14       | -14.63  | <b>&lt;0.01</b> |
|                |                    | Habitat | -0.72    | 0.16       | -4.45   | <b>&lt;0.01</b> |
|                | <i>Tachinidae</i>  | Colour  | 0.26     | 0.12       | 2.10    | <b>0.03</b>     |
|                |                    | Habitat | -0.20    | 0.16       | -1.22   | 0.22            |

|                    |                   |         |       |      |       |                 |
|--------------------|-------------------|---------|-------|------|-------|-----------------|
| <i>Hymenoptera</i> | <i>Therevidae</i> | Colour  | 0.73  | 0.31 | 2.31  | <b>0.02</b>     |
|                    |                   | Habitat | 0.83  | 0.52 | 1.62  | 0.11            |
|                    | <i>Bethylidae</i> | Colour  | 1.02  | 0.39 | 2.63  | <b>&lt;0.01</b> |
|                    |                   | Habitat | 1.93  | 0.72 | 2.67  | <b>&lt;0.01</b> |
|                    | <i>Braconidae</i> | Colour  | 0.20  | 0.20 | 0.99  | 0.32            |
|                    |                   | Habitat | 2.26  | 0.64 | 3.52  | <b>&lt;0.01</b> |
|                    | <i>Scoliidae</i>  | Colour  | -2.81 | 0.34 | -8.20 | <b>&lt;0.01</b> |
|                    |                   | Habitat | -3.58 | 0.50 | -7.20 | <b>&lt;0.01</b> |
|                    | <i>Tiphiidae</i>  | Colour  | -0.11 | 0.16 | -0.71 | 0.48            |
|                    |                   | Habitat | 0.63  | 0.35 | 1.80  | 0.07            |

---

Figure 1: Comparison of the number and percentage of fly and wasp families sampled in our study using two different coloured traps - blue vane trap (BVT) and yellow vane trap (YVT) and within two different levels of wooded cover (habitat type) - Open and wooded, compared with those recorded on the Atlas of Living Australia (ALA) database for the sampling area (~3, 600 km<sup>2</sup>). Records shown for fly families by (a) trap colour and (b) habitat type, and for wasps by (c) trap colour and (d) habitat type. Letters beside names indicate where families were sampled - B=blue, Y=yellow, A=ALA, O=open, W=wooded. Tables below circles provide upper quantile values for the level of overlap between the ALA, BVTs and YVTs, calculated using the Morista-Horn index. A value of zero indicates no overlap, whilst a value of 1 indicates complete overlap.

Figure 2: Average richness of (a) all insect families (flies and wasps), (b) only fly families and (c) only wasp families, trapped per site in blue versus yellow traps. Abundance of individuals for each of these groups shown in (d-f).

Figure 3: Average richness of (a) all insect families (flies and wasps), (b) only fly families and (c) only wasp families, trapped per site in open versus wooded habitats. Abundance of individuals for each of these groups shown in (d-f).

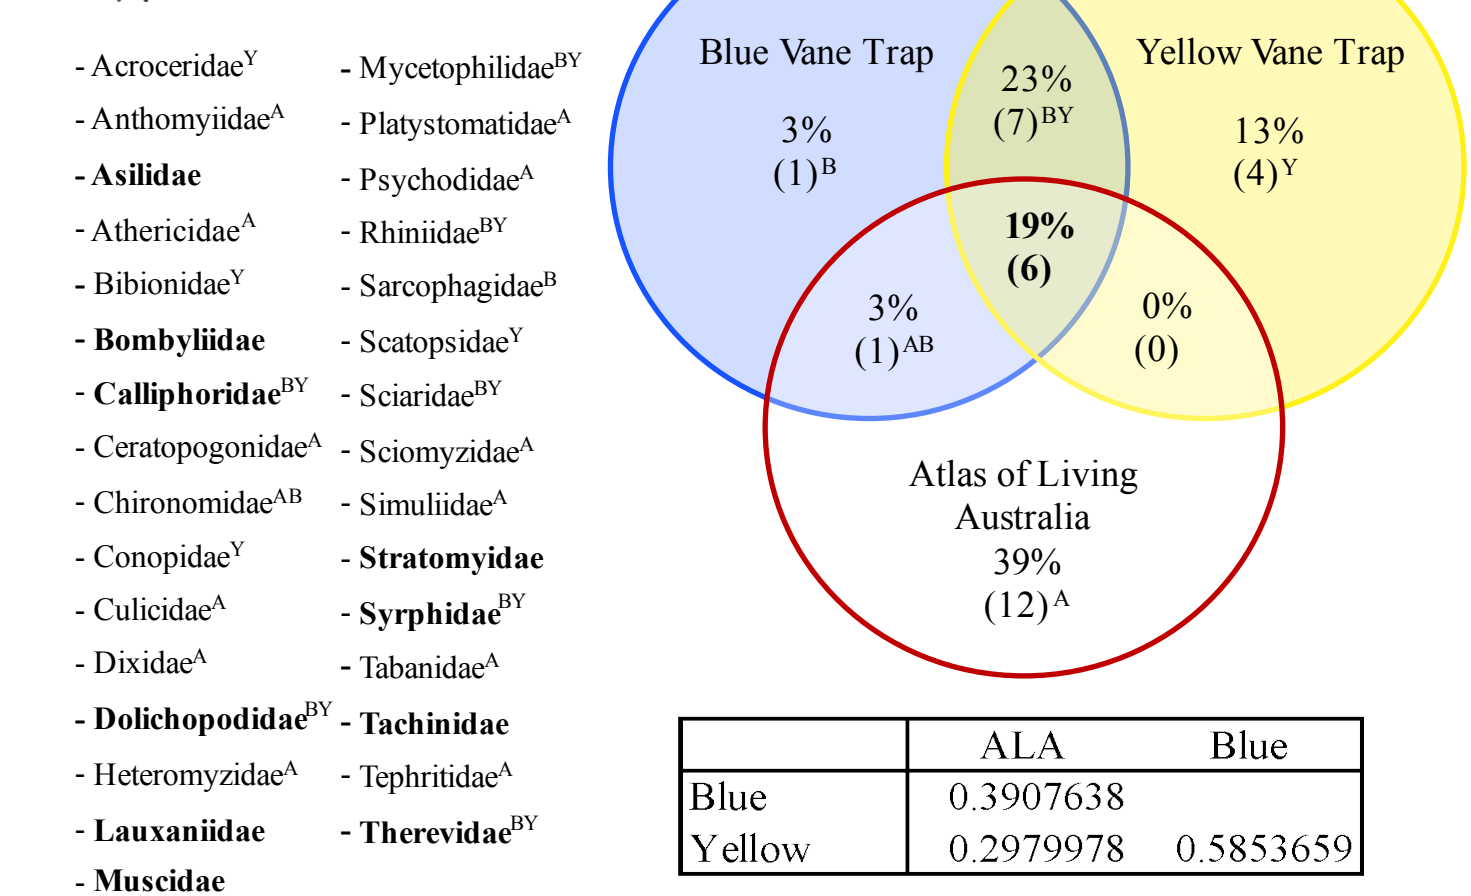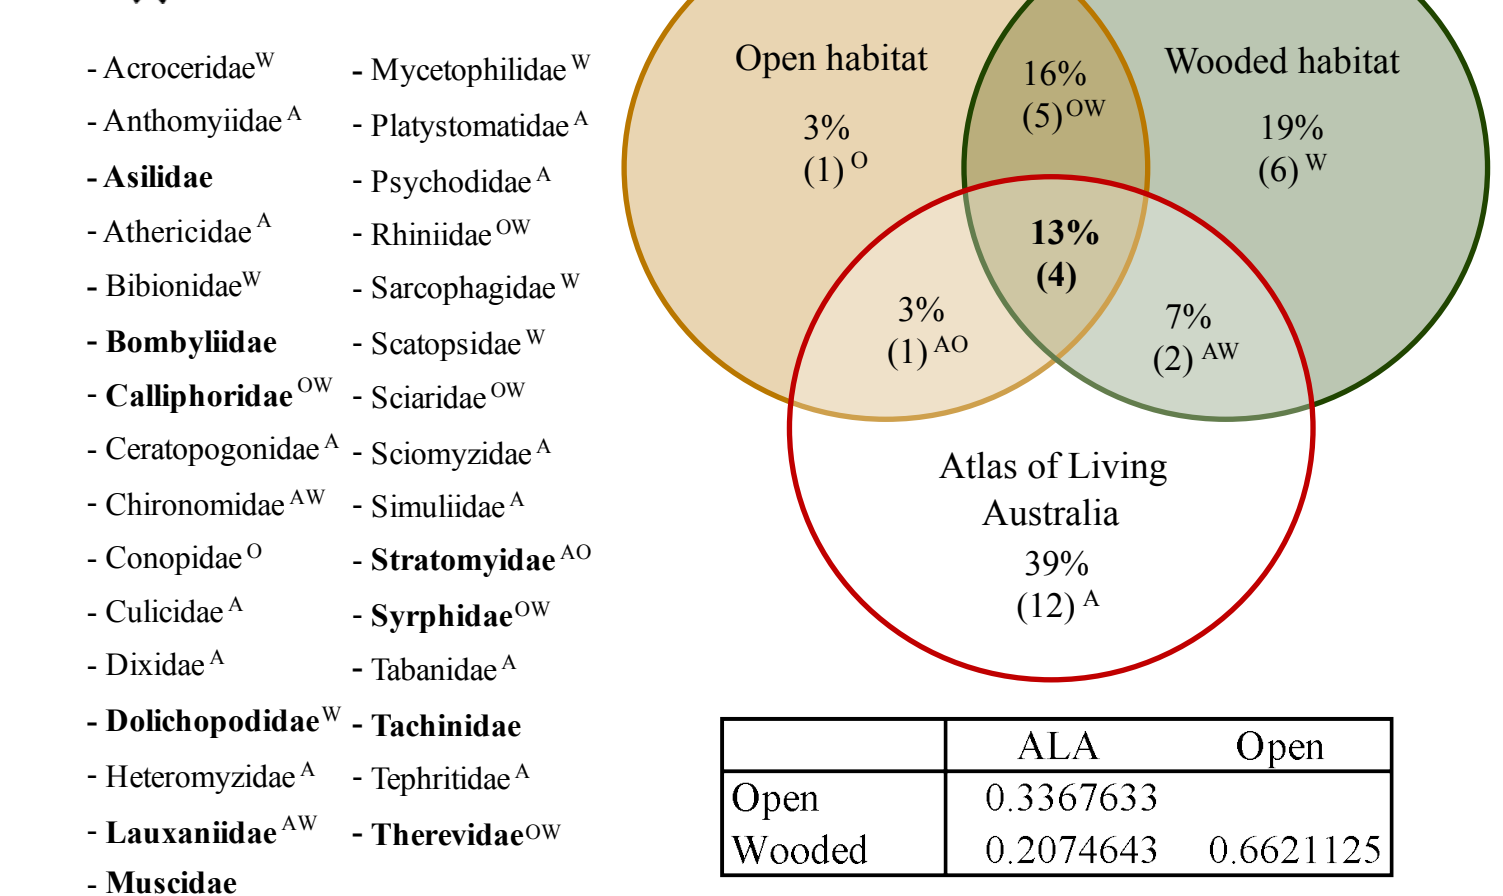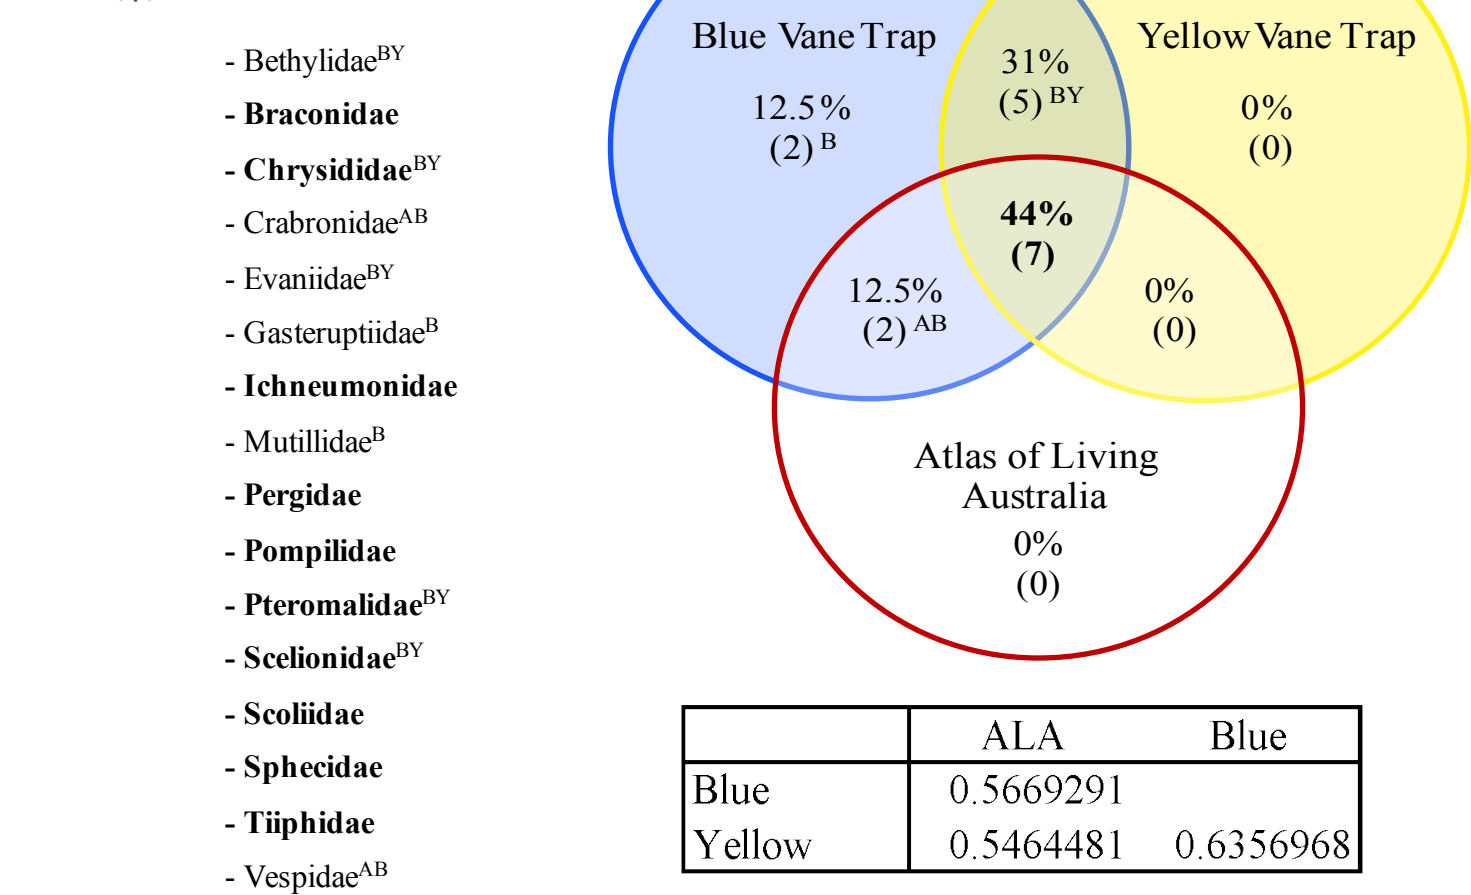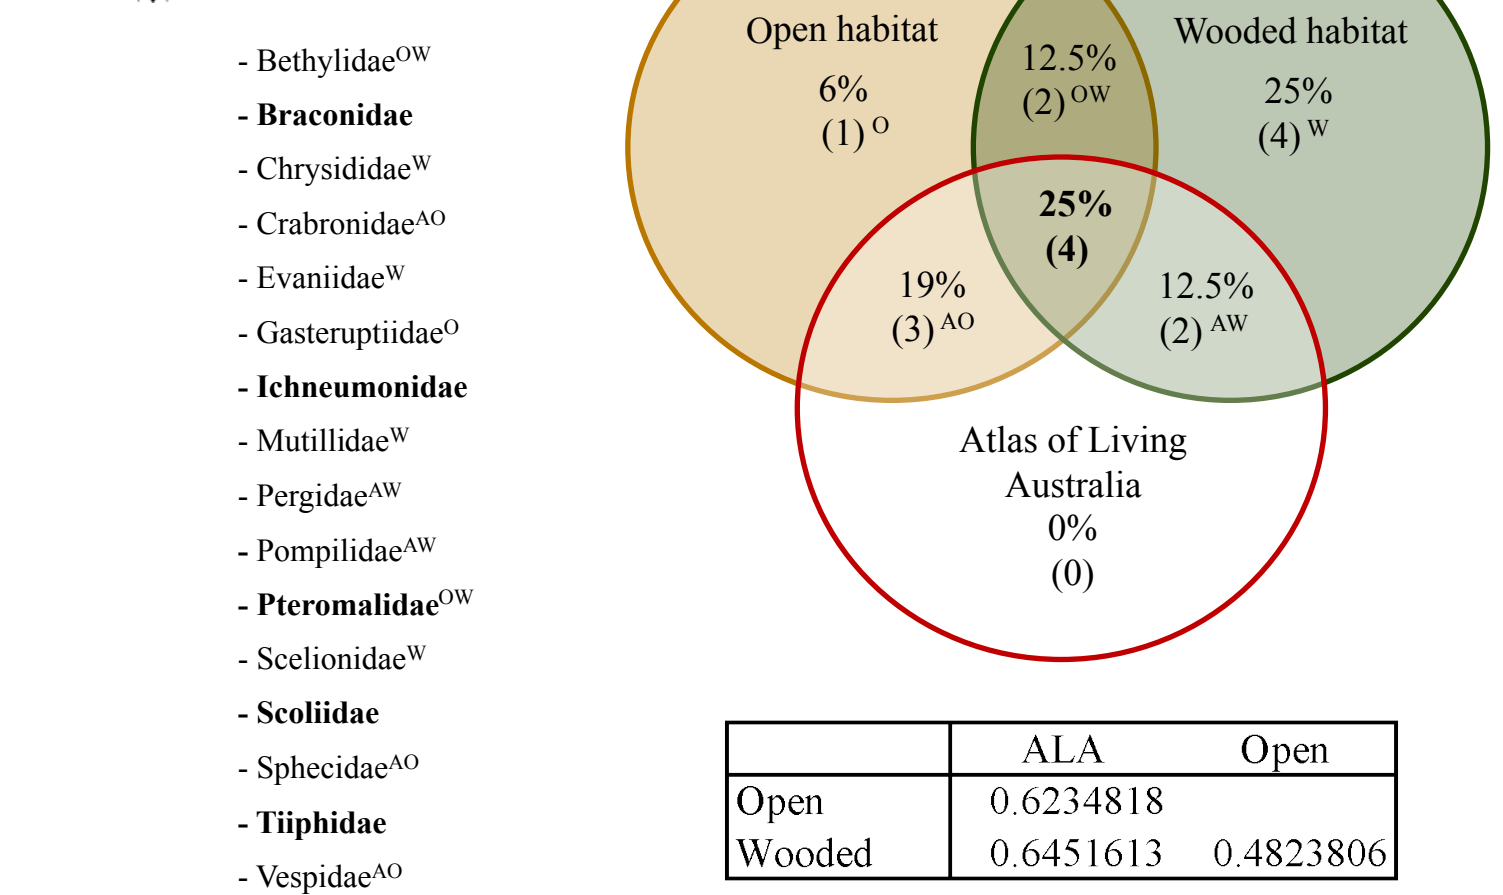

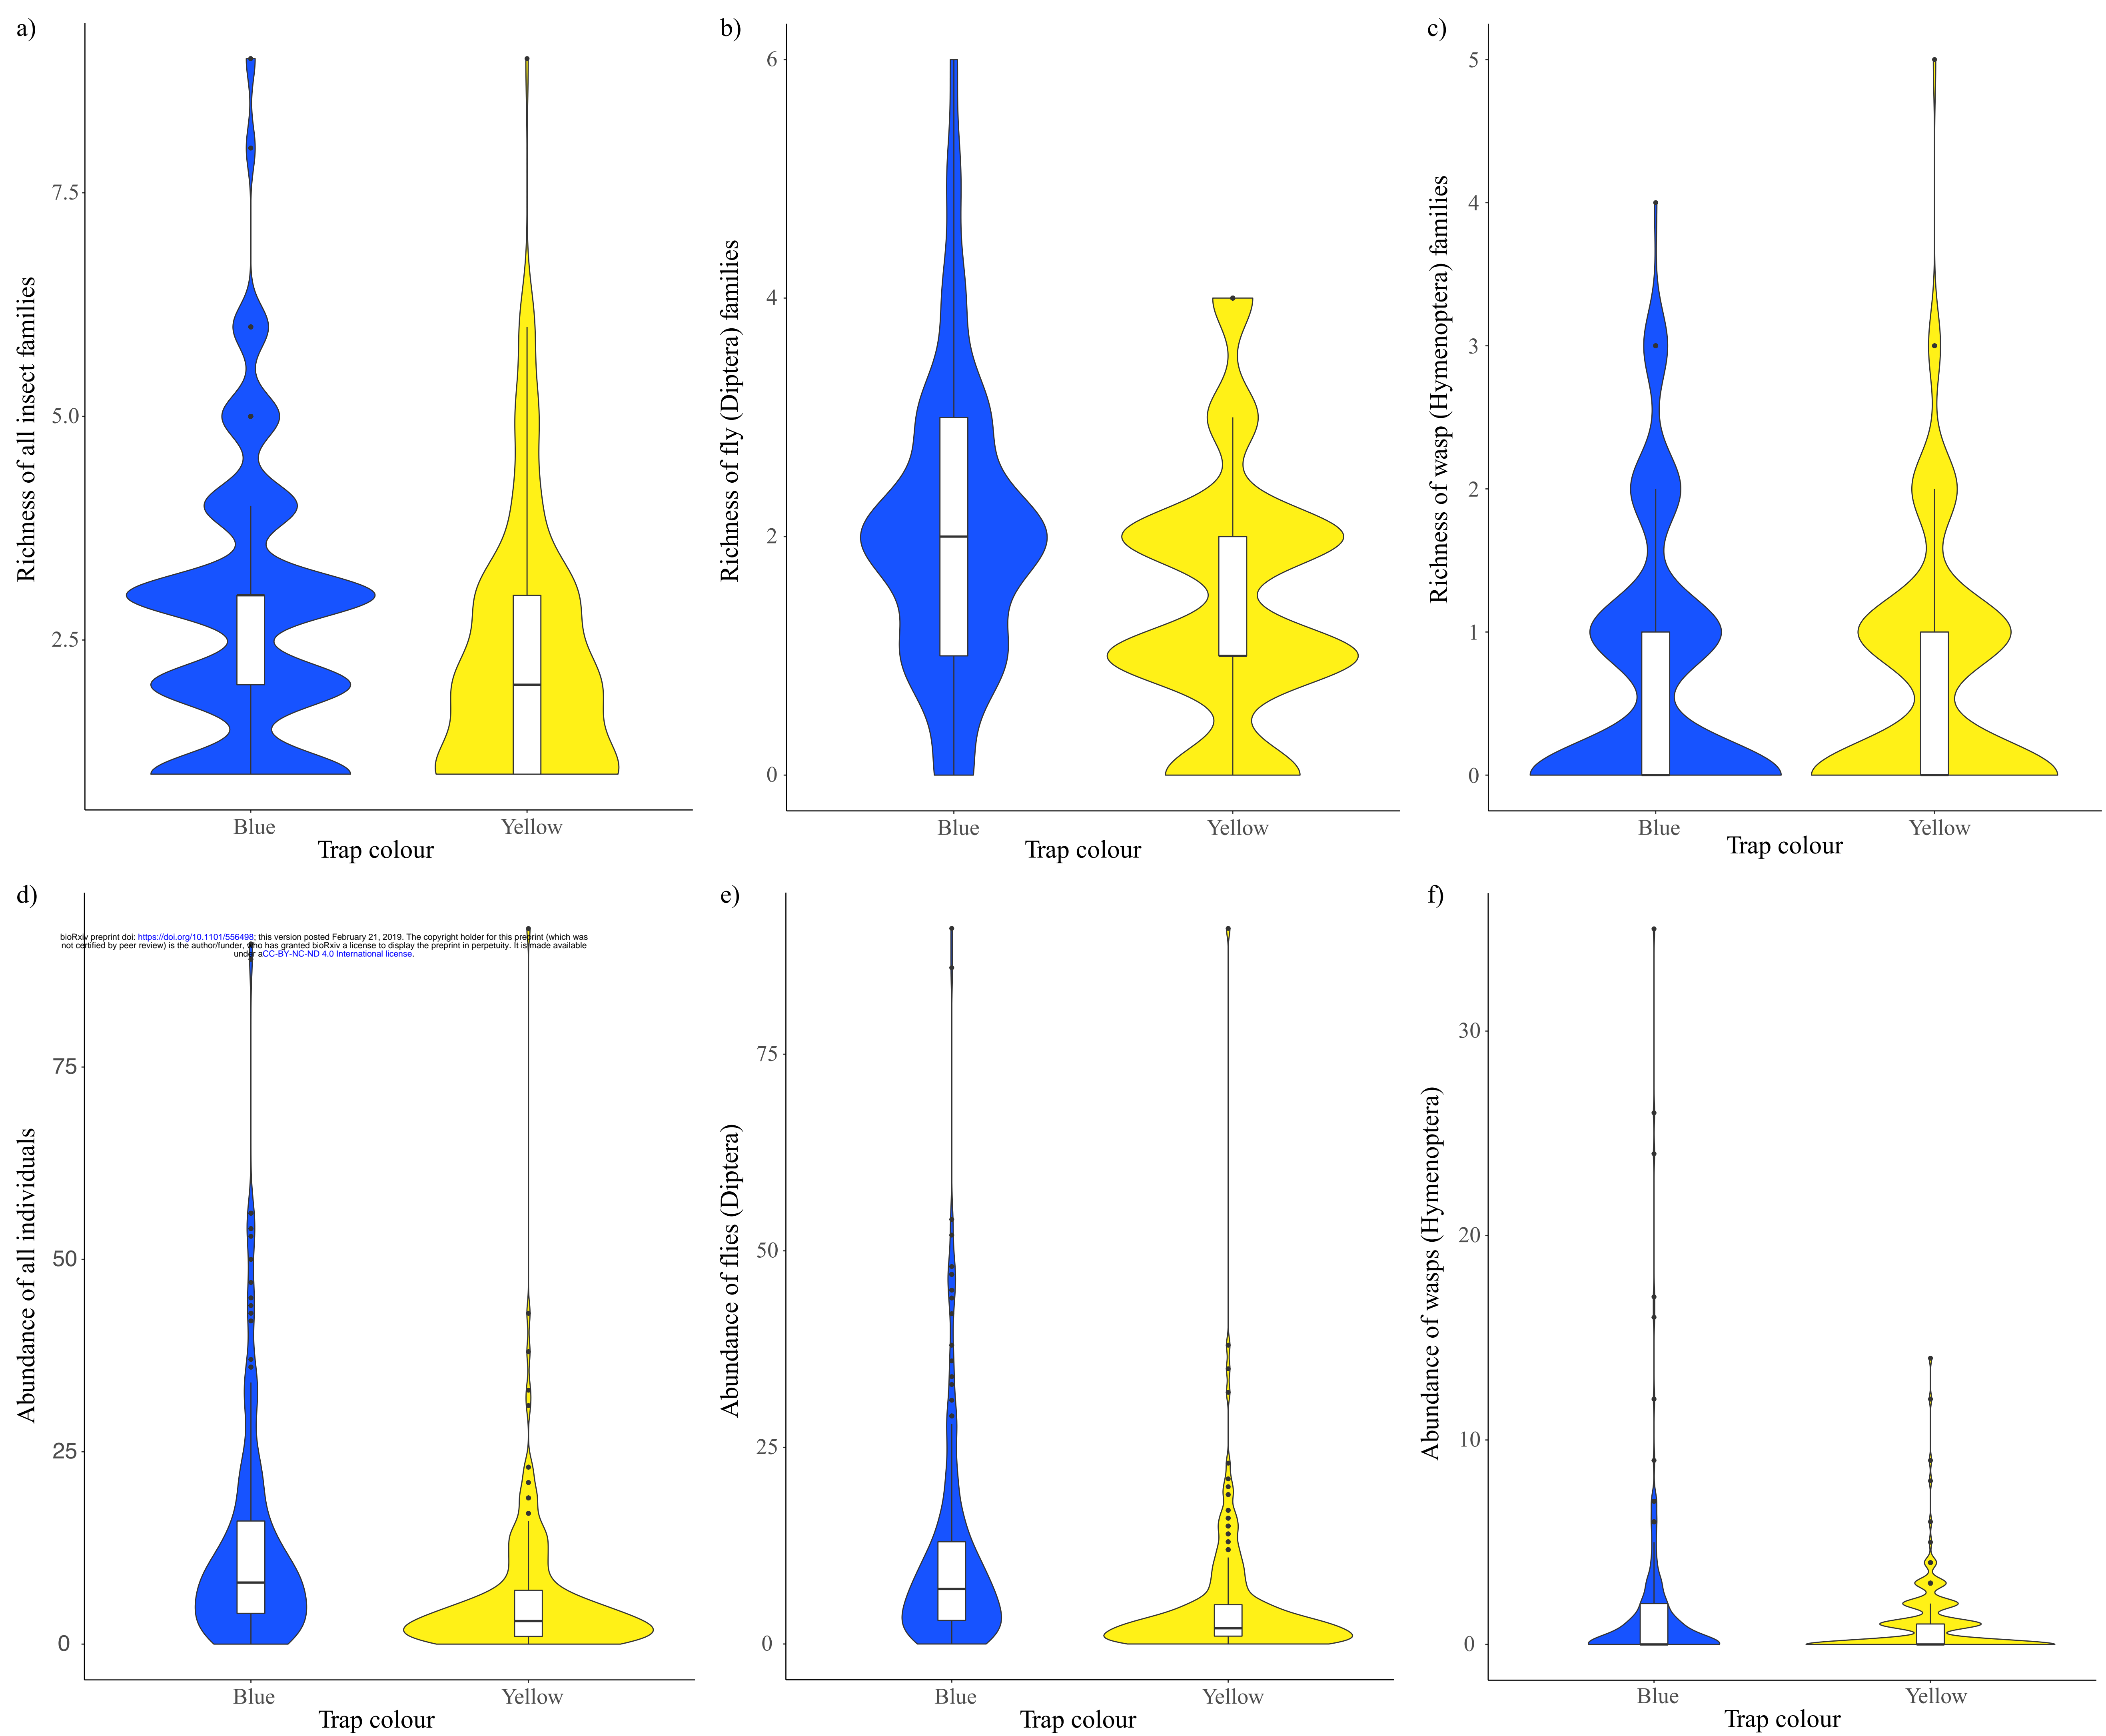

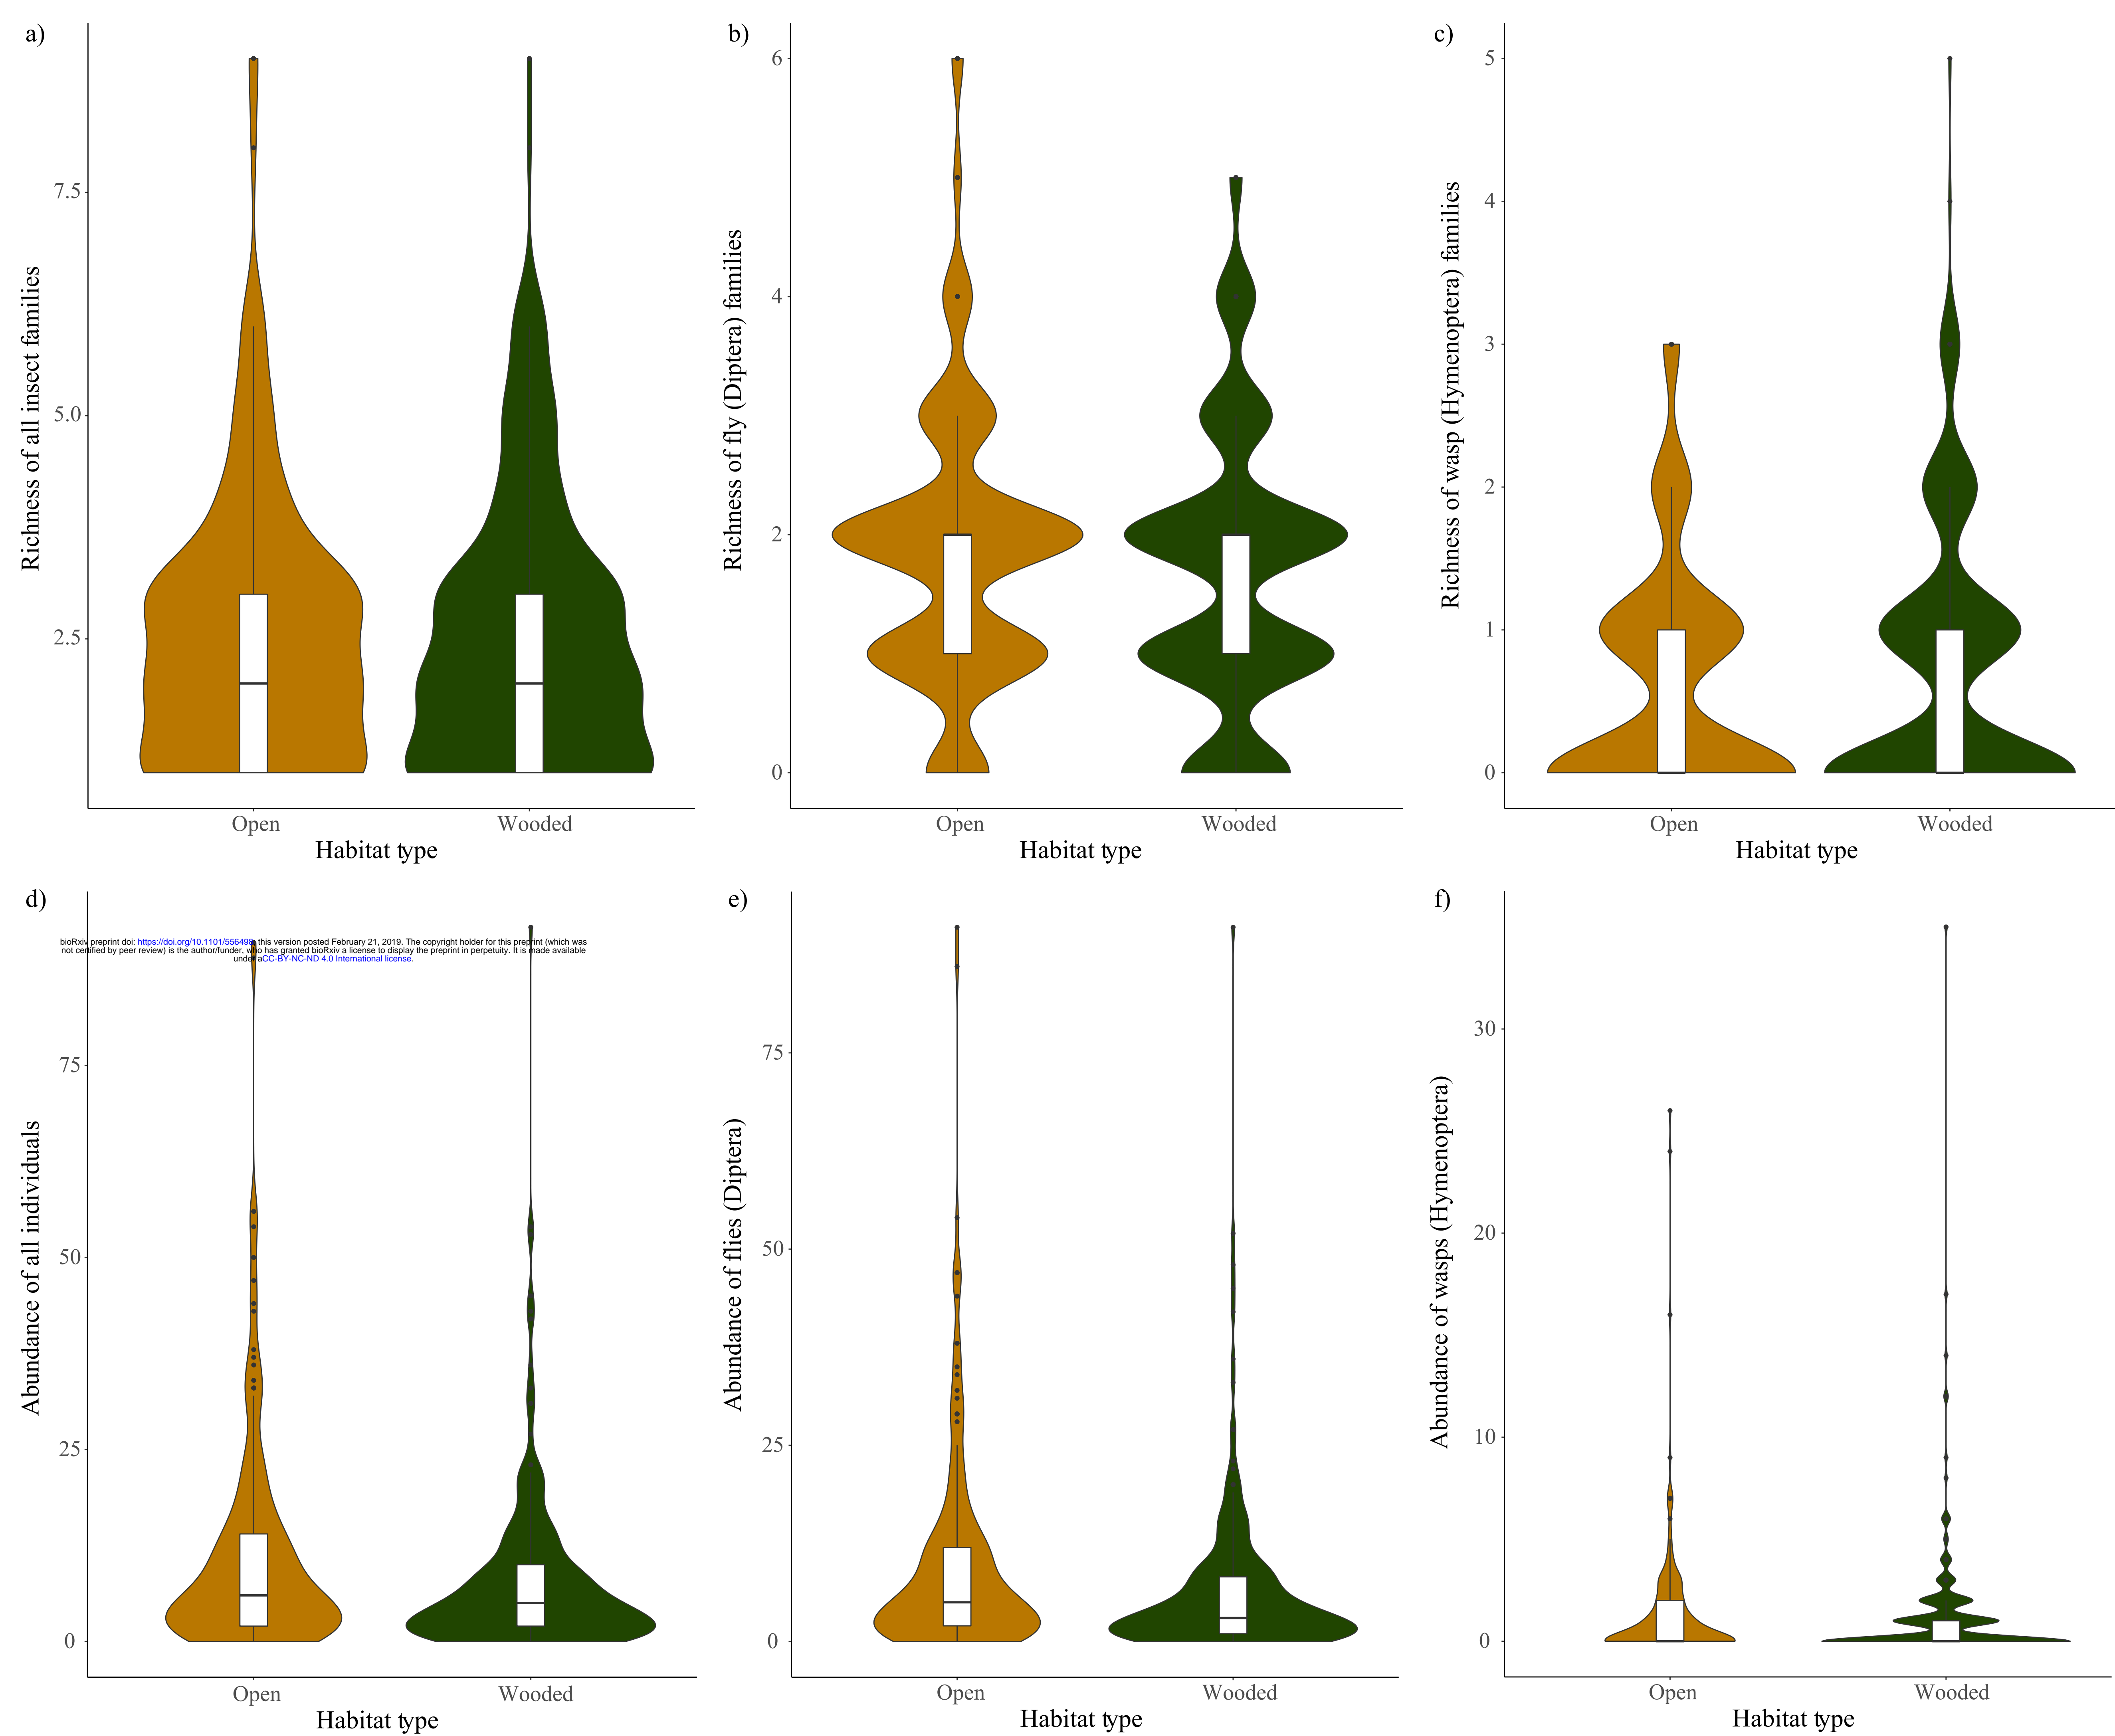

Source: https://www.biorxiv.org/content/10.1101/556498v1.full.pdf
